## 1 **Stem-cell-ubiquitous genes spatiotemporally coordinate division through regulation of** 2 **stem-cell-specific gene networks**

3 Natalie M Clark<sup>1,2</sup>, Eli Buckner<sup>3,†</sup>, Adam P Fisher<sup>1,†</sup>, Emily C Nelson<sup>1,†</sup>, Thomas T Nguyen<sup>1,†</sup>,  
4 Abigail R Simmons<sup>4</sup>, Maria A de Luis Balaguer<sup>1</sup>, Tiara Butler-Smith<sup>1</sup>, Parnell J Sheldon<sup>1,5</sup>,  
5 Dominique C Bergmann<sup>4,6</sup>, Cranos M Williams<sup>3</sup>, Rosangela Sozzani<sup>1,2,\*</sup>

6 1. Department of Plant and Microbial Biology, North Carolina State University, Raleigh,  
7 NC 27695

8 2. Biomathematics Graduate Program, North Carolina State University, Raleigh, NC 27695

9 3. Department of Electrical and Computer Engineering, North Carolina State University,  
10 Raleigh, NC 27695

11 4. Department of Biology, Stanford University, Stanford, CA 94305

12 5. Department of Biology, Denison University, Granville, OH 43023

13 6. Howard Hughes Medical Institute (HHMI), Stanford University, Stanford, CA 94305

14

15 \* Correspondence to Rosangela Sozzani, [ross\\_sozzani@ncsu.edu](mailto:ross_sozzani@ncsu.edu)

16 † These authors contributed equally to this work

## 17 **Abstract**

18 Stem cells are responsible for generating all of the differentiated cells, tissues, and organs in a  
19 multicellular organism and, thus, play a crucial role in cell renewal, regeneration, and  
20 organization. A number of stem cell type-specific genes have a known role in stem cell  
21 maintenance, identity, and/or division. Yet, how genes expressed across different stem cell types,  
22 referred here as stem-cell-ubiquitous genes, contribute to stem cell regulation is less understood.  
23 Here, we find that, in the Arabidopsis root, a stem-cell-ubiquitous gene, TESMIN-LIKE CXC2  
24 (TCX2), controls stem cell division by regulating stem cell-type specific networks. Development  
25 of a mathematical model of TCX2 expression allowed us to show that TCX2 orchestrates the  
26 coordinated division of different stem cell types. Our results highlight that genes expressed  
27 across different stem cell types ensure cross-communication among cells, allowing them to  
28 divide and develop harmonically together.

## 29 **Results**

30 Local signaling pathways, fate predetermination of cell lineages, and cell plasticity are  
31 mechanisms known to maintain stem cell pluripotency<sup>1-9</sup>. However, while roughly 14% of  
32 human transcription factors (TFs) are expressed across 32 different cell and tissue types, most of  
33 their known functions are specifically localized to certain cell types, and their potential roles  
34 across different cell types are unknown<sup>10</sup>. Thus, whether these stem-cell-ubiquitous genes are  
35 upstream of known local and cell-type-specific mechanisms and if such global networks control  
36 the cross-communications between different cell populations is still an open question.

37 To understand how and whether stem-cell-ubiquitous genes contribute to cell identity,  
38 maintenance, and/or division, we performed gene expression analysis of the stem cells in the  
39 Arabidopsis root, as this offers a tractable system given its 3-dimensional radial symmetry and  
40 temporal information encoded along its longitudinal axis. To this end, seven root stem cell  
41 markers (Figure 1A), as well as a non-stem cell control, were used to identify stem cell-enriched  
42 genes, and among those, stem-cell-ubiquitous and stem-cell-specific genes, as it has been shown

43 that there is a correlation between expression levels and functionality in specific cell types<sup>1,10</sup>  
44 (Extended Data Fig 1, see Methods). Notably, we found that the expression profiles of our  
45 markers together with known stem cell genes, agree with their known expression domains,  
46 supporting that our transcriptional profiles are specific to each stem cell population (Extended  
47 Data Fig 1). To measure transcriptional differences between the stem cells and the non-stem  
48 cells, we next performed a Principal Component Analysis (PCA.) Looking at the top 3 principal  
49 components (50.6% of the variation in the data), the PCA shows that the non-stem cell samples  
50 (red) are distant (using the Euclidean distance metric) from all of the stem cell populations,  
51 suggesting that the stem cells have a different transcriptional signature than the non-stem cells  
52 (Figure 1B). Accordingly, when we performed differential expression analysis on these data, we  
53 found that 9266 (28% of genes) are significantly enriched ( $q < 0.05$  and fold change  $> 2$ ) in at  
54 least one stem cell population compared to the non-stem cells and considered these genes the  
55 stem cell-enriched genes (see M&M and Supplemental Table 1). Thus, this approach allowed us  
56 to identify core stem cell genes, as functionally important genes are often enriched in the specific  
57 cell populations they control<sup>1,10</sup>.

58 While the PCA gives us a general idea of how many genes are cell-specific vs cell-ubiquitous, it  
59 reduces the dimensionality of the problem to the three largest components of variance.  
60 Consequently, we would expect some genes been differentially enriched across all of the stem  
61 cell populations. Accordingly, when we performed differential expression analysis on the 9266  
62 stem cell-enriched genes (see Methods), we find that 2018 genes (21.8% of the stem cell-  
63 enriched genes, hereinafter referred to as the stem-cell-ubiquitous genes) are enriched in at least  
64 4 of the 6 unique stem cell types, with 569 of these 2018 (6.1% of the stem cell-enriched genes)  
65 enriched in 5 or 6 cell types (Figure 1C). Moreover, as each stem cell population clusters  
66 independently from the others in the PCA, we identified 7248 genes (78.2% of the stem cell-  
67 enriched genes), hereinafter referred to as the stem-cell-specific genes, enriched in 3 or less stem  
68 cell types, with 4331 of those 7248 genes (46.7% of the stem cell-enriched genes) enriched in  
69 only 1 stem cell type. This suggests that each specific stem cell type has its own, unique  
70 transcriptional signature. Given the separation between stem-cell-ubiquitous genes and stem-cell-  
71 specific genes, we next wanted to know if these two groups of genes have seemingly separated  
72 functions or, for example, if stem-cell-ubiquitous genes modulate stem-cell-specific gene  
73 expression to orchestrate coordinated processes between different cell types.

74 To test the latter hypothesis, in which stem-cell-specific genes are important for regulating cell  
75 type-specific aspects (e.g cell identity), but are regulated by stem-cell-ubiquitous genes so that  
76 stem cell maintenance and divisions are tightly coordinated, we used Gene Regulatory Network  
77 (GRN) inference and predicted the relationships between all 9266 genes enriched in the stem  
78 cells. We used a machine-learning, regression tree approach to infer dynamic networks from  
79 steady state, replicate data<sup>11</sup>. Our inferred GRN found regulations among 2982 (32.2%) of the  
80 stem cell-enriched genes and predicted that the stem-cell-ubiquitous (red) genes are located in  
81 the center of the network, which represents the beginning of the regulatory cascade, and are  
82 highly connected to each other (Figure 2A). Meanwhile, the cell-specific (blue) genes mostly  
83 regulate each other within the same cell type and are located on the outside of the network,  
84 therefore downstream of the cell-ubiquitous genes(Figure 2A). This suggests that the cell-  
85 ubiquitous genes are potentially involved in coordinating processes between different stem cells  
86 through the regulation of cell-specific genes.

87 We next wanted to identify if the most biologically important genes in the network were cell-  
88 specific, cell-ubiquitous, or both, as most results in animals assume that core TFs must be  
89 expressed in a cell-specific manner<sup>1</sup>. To predict biological significance, we developed a Network  
90 Motif Score (NMS) to quantifies the number of times each gene appears in certain network  
91 motifs, such a feedback and feedforward loops<sup>12</sup>. These motifs were chosen as they were  
92 significantly enriched in our biological network versus a random network of the same size, and  
93 have been shown to often contain genes that have important biological functions<sup>13-15</sup> (Extended  
94 Data Fig 2). In our inferred GRN, we found that 737 (24.7%) of the 2982 genes have an NMS >  
95 0, meaning they appear in at least one of the network motifs. To validate the NMS, we found that  
96 22 known stem cell regulators had scores in the top 50% of genes, with 10 of those 22 (45.5%) in  
97 the top 25% of genes, supporting that high NMS scores are correlated with stem cell function  
98 (Supplemental Table 2). Further, 510 (69.2%) and 217 (31.8%) of these genes are cell-ubiquitous  
99 (4 or more enriched stem cells, red) and cell-specific (3 or less enriched stem cells, blue),  
100 respectively (Figure 2A). This result is in contrast to that of animal systems, which often assume  
101 that core genes have highly cell-specific expression<sup>1</sup>. However, we reasoned that by assuming  
102 that core genes must have cell-specific expression, previous studies may have missed genes  
103 related to stem cell maintenance that are expressed in multiple cell types. Given that more cell-  
104 ubiquitous genes have higher importance scores in our dataset, we focused our downstream  
105 analysis on identifying a stem-cell-ubiquitous gene with characteristics of a functionally  
106 important regulator.

107 When we began to examine the stem-cell-ubiquitous regulators, we found that TESMIN-LIKE  
108 CXC 2 (TCX2, also known as SOL2), a known homologue of the LIN54 DNA-binding  
109 component of the mammalian DREAM complex which regulates the cell cycle and the transition  
110 from cell quiescence to proliferation<sup>16-18</sup>, had the ninth highest NMS (top 1.2% of genes). This  
111 suggests that TCX2 could have an important role across all of the stem cells. To further support  
112 the biological significance of TCX2, we examined the subnetwork of its first neighbors (i.e.,  
113 genes predicted to be either directly upstream or downstream of TCX2). We found that TCX2 is  
114 enriched in 5 out of the 6 stem cell types and predicted to regulate at least one gene in all of  
115 those cell types, supporting that TCX2 could be a stem-cell-ubiquitous regulator that controls  
116 stem-cell-specific core genes (Figure 2B). In addition, when compared to the genes with the top  
117 10 NMS, TCX2 has the highest outdegree (number of edges going out) and low indegree  
118 (number of edges coming in), suggesting that TCX2 could orchestrate coordinated stem cell  
119 division as suggested by the function of its mammalian homologue<sup>16-18</sup>.

120 If TCX2 is indeed a key regulator for stem cell maintenance and division, we would expect that a  
121 change in its expression would cause a developmental phenotype related to these aspects. To test  
122 this hypothesis, we obtained two knockdown (*tcx2-1*, *tcx2-2*) and one knockout (*tcx2-3*) mutants  
123 of TCX2, which all show similar phenotypes (Figure 3A, Extended Data Fig 3). Importantly, we  
124 observed in *tcx2-3* an overall disorganization of the stem cells, including aberrant divisions in the  
125 Quiescent Center (QC), columella, endodermis, pericycle, and xylem cells (Figure 3A).  
126 Additionally, *tcx2-3* mutants showed longer roots due to a higher number in meristematic cell/  
127 higher proliferation (Figure 3A, Extended Data Fig 3). Notably, similar phenotypes related to  
128 cell divisions have been observed also in the stomata of *tcx2* mutants<sup>16</sup>. Taken together, these  
129 results suggest that TCX2, as stem-cell-ubiquitous genes, regulates stem cell divisions in a cell-  
130 type specific manner.

131 We hypothesized that TCX2 controls stem cell division by regulating important, cell type-  
132 specific genes. Notably, all of our stem cell markers, in addition to being expressed only to one  
133 stem cell type, are known to have functions in stem cell regulation<sup>19–23</sup>. Thus, we crossed the  
134 marker lines for the Quiescent Center (QC; WOX5:GFP), Cortex Endodermis Initials (CEI;  
135 CYCD6:GFP), Epidermis/Lateral Root Cap Initials (Epi/LRC;FEZ:FEZ-GFP), and Xylem  
136 Initials (Xyl;TMO5:3xGFP) (Figure 1A) into the *tcx2-2* and *tcx2-3* mutant alleles (Figure 3B).  
137 Compared to WT, in a *tcx2* mutant the expression pattern of these markers is expanded.  
138 Specifically, the QC marker expands into the CEI, the CEI marker expands into the endodermis  
139 and cortex layers, the Epi/LRC marker expands into the Columella Stem Cells (CSCs), and the  
140 Xyl marker expands into the procambial cells (Figure 3B). This suggests that in the absence of  
141 TCX2 coordination of stem cell division and identity is unregulated through an unknown  
142 mechanism.

143 When we examined the predicted upstream regulators and downstream targets of TCX2, we  
144 found that 75% are predicted to be cell-specific (expressed in  $\leq 3$  stem cell types), suggesting that  
145 TCX2 could be regulated and it regulates targets in a cell type-specific manner. (Supplemental  
146 Table 3). Thus, to identify additional cell-specific regulators as well as targets of TCX2, we  
147 obtained mutants of the transcription factors (TFs) predicted to be TCX2's first neighbors (i.e.  
148 directly upstream or downstream) that also had high NMS scores (Figure 3C, Supplemental  
149 Table 3). Two of the genes, SHORTROOT (SHR), and SOMBRERO (SMB) have phenotypes in  
150 the stem cells of their loss-of-function mutants, while the loss-of-function mutant of STERILE  
151 APETALA (SAP) is homozygous sterile<sup>20,22,24–26</sup>. Additionally, a quadruple mutant of  
152 REVOLUTA (REV) together with three other xylem regulators results in missing xylem layers<sup>27</sup>.  
153 Further, we obtained loss-of-function mutants of GATA TRANSCRIPTION FACTOR 9  
154 (GATA9), AT1G75710, ORIGIN OF REPLICATION COMPLEX 1B (ORC1B),  
155 ANTHOCYANINLESS 2 (ANL2), and REPRODUCTIVE MERISTEM 28 (REM28), which  
156 showed root stem cell phenotypes (Figure 3C, Extended Data Fig 4). We were able to validate  
157 that TCX2 was differentially expressed ( $p < 0.05$ ) in *gata9*, *at1g75710*, *rev*, *orc1b*, and *anl2*  
158 mutants as well as in the SHR overexpression line<sup>20</sup> (75.0% of the 8 predicted upstream  
159 regulators). Additionally, we observed that REM28 and SAP (50% of the 4 predicted  
160 downstream TCX2 targets) were differentially expressed in the *tcx2-3* mutant (Figure 3D,  
161 Supplemental Table 3, Extended Data Fig 4). Overall these results suggest TCX2 orchestrates  
162 coordinated stem cell divisions through stem-cell-specific regulatory cascades. Accordingly,  
163 given that most of the validated upstream regulators of TCX2 are stem-cell-type specific  
164 (Supplemental Table 3), we propose that these cell-specific regulators modulate the dynamics of  
165 TCX2 expression in individual cell types. In turn, changes in TCX2 dynamics correlate with  
166 changes in expression of its downstream targets (Figures 3C, 3D). Thus, we hypothesized that  
167 dynamics of TCX2 differ in specific stem cells, as well as changes in TCX2 expression could be  
168 used to predict when each stem cell population divides.

169 If TCX2 expression is dynamically changing over time in a cell-specific manner, we would  
170 predict that the TCX2 GRN also changes temporally. Specifically, we could expect that TCX2  
171 differentially regulates its targets in specific cell types at certain times depending on its  
172 expression levels. Thus, to determine if the TCX2 regulatory network changes over time, we first  
173 selected 176 genes of interest that were differentially expressed in the transcriptional data we  
174 obtained for *tcx2-3* mutant (Supplementary Table 4) as well as enriched in the stem cells, as  
175 these are most likely to be the downstream of TCX2 in the stem cells. We inferred GRNs using a

176 time course of the root meristem that is stem cell-enriched<sup>28</sup> (hereinafter referred to as the stem  
177 cell time course) to predict one network per time point (every 8 hours from 4 days to 6 days). We  
178 found that genes in the first neighbor network of TCX2 have different predicted regulations  
179 depending on the time point. Specifically, most of the regulation to and from TCX2 are predicted  
180 to occur between 4 days (4D) and 5 days (5D), which is the developmental time at which many  
181 stem cell divisions take place<sup>20</sup>. (Extended Data Fig 5). Thus, since our gene expression data  
182 suggest that loss of TCX2 function correlates with an increase in stem cell division, we  
183 hypothesized that most of the TCX2-regulated stem cell division is occurring between 4D 16H  
184 and 5D, time at which TCX2 expression decreases at least by 1.5 fold-change (Extended Data  
185 Fig 5).

186 To test how these time- and cell-specific GRNs affect TCX2 expression and therefore cell  
187 division, we built a mechanistic model of the GRNs predicted every 8 hours from 4D to 5D (see  
188 M&M and Supplementary Information). We used our stem cell time course to determine the cell-  
189 specific networks at each time point and constructed equations for each gene in the network  
190 (Figure 4A, Extended Data Fig 6). Unlike our GRN, which only predicts the regulations in each  
191 cell at each time point, our Ordinary Differential Equation (ODE) model converts the network  
192 prediction into a quantitative model of gene expression. Thus, this model allowed us to quantify  
193 how TCX2 dynamics change over time and to correlate significant changes in expression with  
194 cell division. Our model included the possibility of some of the proteins moving between cell  
195 types, as this is a known local signaling/ cell-to-cell communication mechanism<sup>25,29</sup>. Specifically,  
196 we used scanning Fluorescence Correlation Spectroscopy (Scanning FCS) and observed that  
197 TCX2 does not move between cells, thus suggesting a cell-autonomous function, while observed  
198 movement of WOX5<sup>28</sup> and CRF2/TMO3 between cells is in line with a non-cell-autonomous  
199 function (Extended Data Fig 7). As our sensitivity analysis predicted that the oligomeric state of  
200 TCX2 in the Xyl, diffusion coefficient of WOX5 from the CEI to the QC, and diffusion  
201 coefficient of WOX5 from the QC to the Xyl were three of the most important parameters in the  
202 model, we experimentally determined these parameters (Extended Data Fig 6, Supplemental  
203 Table 5). Given that our network and time course data predict that TCX2-mediated cell division  
204 is tightly coordinated and controlled between 4D 16H and 5D, we wanted to ensure that we  
205 accurately measured TCX2 dynamics in this time period to produce the best predictive model of  
206 stem cell division. To this end, we quantified the expression of the TCX2:TCX2-YFP marker in  
207 different stem cells every 2 hours from 4D 18H to 4D 22H (hereinafter referred to as the YFP  
208 tracking data) (Figure 4B, see M&M). We then used the average expression of TCX2 in each cell  
209 at each time point to estimate parameters in our model (Supplemental Table 6). The result of this  
210 model is thus a spatiotemporal map of the expression dynamics of TCX2 and its predicted first  
211 neighbors. Given that TCX2 expression has previously been shown to disappear 1-2 hours before  
212 stomatal division<sup>16</sup>, we reasoned that we could use our model of TCX2 expression to predict  
213 when stem cell division occurs in the root.

214 Our model predicts that there is a significant (fold-change > 1.5) increase in TCX2 expression  
215 specifically in the QC and Xyl between 4D 8H and 4D 16H. After this time, our model predicts  
216 that the expression of TCX2 in the QC does not significantly decrease and is significantly higher  
217 than in all of the actively dividing stem cells (Figure 4C, Supplemental Table 7). Given that the  
218 QC does not divide at 5D<sup>28</sup>, this suggests that high levels of TCX2 correlate with a lack of QC  
219 division. This prediction is supported by our YFP tracking data which shows that half of the QC  
220 cells have relatively constant TCX2 levels between 4D 16H and 5D (Extended Data Fig 8).

221 Meanwhile, TCX2 expression is predicted to significantly decrease between 4D 16H and 5D in  
222 both the Xyl and CSCs, suggesting that these cells divide during this time. This prediction is also  
223 supported by our YFP tracking data showing that the majority of Xyl and CSCs cells have no  
224 TCX2 expression after 4D 20H (Extended Data Fig 8). In contrast, the CEI and Epi/LRC show  
225 only a modest decrease in TCX2 expression between 4D 16H and 5D. This could be due to only  
226 some of these cells dividing at that time, as our YFP tracking data shows a large amount of  
227 variation in TCX2 expression in these cell populations (Extended Data Fig 8). Taken together,  
228 our model and experimental data both suggest that TCX2 not only initiates the division of the  
229 actively dividing stem cells, but it also inhibits the division of the QC during the same  
230 timeframe, through an unknown mechanism. Further, our results allow us to narrow the timing of  
231 TCX2-induced stem cell division to a 4-hour window, between 4D 20H and 5D.

232 Overall, our results show TCX2 as an important cell-ubiquitous gene that regulates stem cell  
233 division by coordinating cell-specific regulatory networks. We showed that *tcx2* mutants have  
234 additional cell divisions in all stem cell populations and misexpression of known cell-specific  
235 marker genes. Further, we validated that TCX2 regulates cell-specific genes, supporting that cell-  
236 ubiquitous and cell-specific genes work together to coordinate cell division. Our mechanistic  
237 model of the TCX2 GRN illustrated that we can use TCX2 expression to predict the timing of  
238 stem cell division. Our results provide evidence that cell-ubiquitous genes and global signaling  
239 mechanisms are important for maintaining stem cell identity and plasticity.

## 240 **Materials and Methods**

### 241 **Lines used in this study**

242 A list of T-DNA insertion lines used in this study is provided in Supplemental Table 8. All T-  
243 DNA insertion lines were obtained from the Arabidopsis Biological Resource Center (ABRC:  
244 <https://abrc.osu.edu/>). The marker lines used in this study are described as follows:  
245 WOX5:GFP<sup>19</sup>, CYCD6:GFP<sup>20</sup>, J2341:GFP<sup>30</sup>, FEZ:FEZ-GFP<sup>22</sup>, TMO5:3xGFP<sup>23</sup>, CVP2:NLS-  
246 VENUS<sup>31</sup>, AGL42:GFP<sup>32</sup>. The TCX2:TCX2-YFP translation fusion is described in<sup>16</sup>, the  
247 WOX5:WOX5-GFP translational fusion is described in<sup>28</sup>, and the TMO3:TMO3-GFP  
248 translational fusion is described in<sup>33</sup>.

### 249 **Stem cell transcriptional profile**

250 Three to four biological replicates were collected for each marker line. For each biological  
251 replicate, 250-500mg of seed were wet sterilized using 50% bleach, 10% Tween and water and  
252 stratified at 4°C for 2 days. Seeds were plated on 1x MS, 1% sucrose plates with Nitex mesh and  
253 grown under long day conditions (16 hr light/8 hr dark) at 22°C for 5 days. Protoplasting, cell  
254 sorting, RNA extraction, and library preparation were performed as described in<sup>36</sup>. For the non-  
255 stem cell control, the GFP-negative cells from the AGL42:GFP line were collected. Libraries  
256 were sequenced on an Illumina HiSeq 2500 with 100bp single end reads. Reads were mapped  
257 and FPKM (fragments per kilobase per million mapped reads) values were obtained using  
258 Bowtie, Tuxedo, and Rsubread as described in<sup>34</sup>. Data are available on Gene Expression  
259 Omnibus (GEO: <https://www.ncbi.nlm.nih.gov/geo/>), accession #GSE98204.

### 260 **Differential expression analysis**

261 Differential expression analysis was performed using PoissonSeq<sup>34,35</sup>. First, stem cell-enriched  
262 genes were identified as being enriched (q-value < 0.05 and fold change > 2) in any one stem cell

263 population compared to the non-stem cell control. Then, genes were classified as enriched in  
264 each stem cell type if they met the enrichment criteria in that stem cell type versus all other stem  
265 cell types. If genes were equally expressed in more than one stem cell type, they were considered  
266 enriched in multiple stem cell types. All differentially expressed genes are reported in  
267 Supplemental Table . The Venn diagram in Figure 1C displaying the proportions of genes  
268 enriched in each stem cell was constructed using InteractiVenn<sup>36</sup> (<http://www.interactivenn.net/>).

## 269 **Gene regulatory network inference**

270 The Regression Tree Pipeline for Spatial, Temporal, and Replicate data (RTP-STAR<sup>11</sup>) was used  
271 for all network inference. All networks were inferred using the default parameters described in<sup>11</sup>.  
272 For the SCN GRN, networks were inferred for each stem cell separately (resulting in 6 networks,  
273 one for each stem cell) and then combined to form the final network. For the stem-cell-specific  
274 networks, only the genes enriched in that specific stem cell were used in the network inference.  
275 If genes were enriched in multiple stem cells, they were included in all of those individual stem  
276 cell networks (e.g. TCX2, which is enriched in all of the stem cells except Protophlo, was  
277 included in 5 of the 6 stem cell networks). In addition, only the replicates from that specific stem  
278 cell and the SCN marker were used for the inference (e.g. for the QC-enriched cells, only the  
279 WOX5:GFP and AGL42:GFP replicates were used). Due to the pseudo-random nature of *k*-  
280 means clustering (i.e., the first clustering step is always random), 100 different clustering  
281 configurations were used for network inference. Edges that appeared in at least 1/3 of the 100  
282 different networks were retained in the final network as this cutoff resulted in a scale-free  
283 network. For the time point-specific GRNs, the same parameters were used as for the SCN GRN.  
284 The replicates from the stem cell time course<sup>28</sup> were used to construct each network at each time  
285 point. All network visualization was performed using Cytoscape (<http://cytoscape.org/>).

## 286 **Biological validation**

287 Confocal imaging was performed on a Zeiss LSM 710. Cell walls were counterstained using  
288 propidium iodide (PI). The corrected total cell fluorescence (CTCF) was calculated as in<sup>28</sup>. When  
289 counting cells with GFP expression, a local auto threshold using the Phansalkar method (REF)  
290 was applied in ImageJ to the GFP channel before counting. For qPCR, total RNA was isolated  
291 from approximately 2mm of 5 day old Col-0, *gata9-1*, *gata9-2*, *at1g75710-1*, *at1g75710-2*, *rev-*  
292 *5*, *orc1b-1*, *orc1b-2*, *anl2-2* and *anl2-3*, root tips using the RNeasy Micro Kit (Qiagen). qPCR  
293 was performed and analyzed as described in<sup>28</sup>. Differential expression was defined as a  $p < 0.05$   
294 using a z-test with a known mean of 1 and standard deviation of 0.17 (based on the Col-0  
295 sample). Primers used for qPCR are provided in Supplementary Table 9. SHR regulation of  
296 TCX2 was validated using data from<sup>20</sup>.

297 For the *tcx2-3* transcriptional profile, total RNA was isolated from approximately 2mm of 5 day  
298 old Col-0 and *tcx2-3* root tips using the RNeasy Micro Kit. cDNA synthesis and amplification  
299 were performed using the NEBNext Ultra II RNA Library Prep Kit for Illumina. Libraries were  
300 sequenced on an Illumina HiSeq 2500 with 100 bp single-end reads. Reads were mapped and  
301 differential expression was calculated as previously described, except the q-value threshold was  
302 set to 0.5 based on the q-value of TCX2, which was assumed to be differentially expressed in its  
303 own mutant background. Data are available on GEO, accession #GSE123984.

## 304 305 **TCX2:TCX2-YFP tracking**

306 Confocal images of the TCX2:TCX2-YFP line were obtained by imaging roots submerged in  
307 agar every 2 hours. A MATLAB-based image analysis software was used to detect, segment, and  
308 track individual cells expressing TCX2:TCX2-YFP in 3D time-course fluorescence microscopy  
309 images<sup>37</sup>. The average voxel intensity, which is a proxy for YFP expression, was measured as the  
310 average voxel value within the set of voxels describing a segmented cell.

### 311 **Scanning Fluorescence Correlation Spectroscopy (Scanning FCS)**

312 Image acquisition for Scanning FCS was performed on a Zeiss LSM880 confocal microscope.  
313 For Number and Brightness (N&B) on the TCX2:TCX2-YFP and 35S:YFP lines, the parameters  
314 were set as follows: image size of 256x256 pixels, pixel dwell time of 8.19  $\mu$ s, and pixel size of  
315 100 nm. The 35S:YFP line was used to calculate the monomer brightness and cursor size as  
316 described in<sup>25,38</sup>. For Pair Correlation Function (pCF) on the 35S:GFP, TCX2:TCX2-YFP and  
317 TMO3:TMO3-GFP lines, the parameters were set as follows: image size of 32x1 pixels, pixel  
318 dwell time of 8.19  $\mu$ s, and pixel size between 100-500nm. The movement index (MI) of the  
319 35S:GFP line was used as a positive control. All analysis was performed in the SimFCS software  
320 as described in<sup>25,38</sup>.

### 321 **Ordinary Differential Equation (ODE) modeling**

322 ODE equations were constructed based on the GRNs shown in Figure 4A. One set of equations  
323 was built for each gene in each cell type. The equations changed at 4D 8H and 4D 16H to  
324 account for the changes in the predicted network (as shown in Figure 4A). If a sign was not  
325 predicted in the network, it was assumed that the regulation was positive (activation) in the  
326 model. A schematic showing the location of genes, and what proteins can move between cell  
327 types, is presented in Extended Data Fig 6. All equations are provided in Supplemental  
328 Equations.

329 A sensitivity analysis was performed using the total Sobol index<sup>25,38,39</sup>. Sensitive parameters  
330 were defined as having a significantly higher ( $p < 0.05$ ) total Sobol index than the control  
331 parameter using a Wilcoxon Test with Steel-Dwass for multiple comparisons. (Supplemental  
332 Table 5) The sensitive diffusion coefficients and oligomeric states were experimentally measured  
333 using scanning FCS. The remainder of the parameters were estimated either directly from the  
334 stem cell time course, or by using simulated annealing on the stem cell time course as described  
335 in<sup>28</sup>. All parameter values, and how they were estimated, are reported in Supplemental Table 6.

### 336 **Contributions**

337 NMC and RS conceptualized the study and designed the experiments. NMC and APF performed  
338 transcriptional profiling. NMC and MAdLB performed differential expression analysis. NMC,  
339 ECN, TTN, TBS, and PJS performed biological validation. NMC, ECN, TTN, and PJS collected  
340 confocal images. NMC constructed and analyzed the mathematical model. ARS and DCB  
341 contributed the TCX2:TCX2-YFP translational fusion. EB and CMW analyzed the YFP tracking  
342 data. NMC and RS wrote the paper, and all co-authors edited the paper.

### 343 **Acknowledgements**

344 We thank Christian Hardtke for providing the CVP2:NLS-VENUS line and Rüdiger Simon for  
345 providing the WOX5:WOX5-GFP line. We thank Irena Brglez for her assistance with media  
346 preparation. We thank Sarah Schuett and the Flow Cytometry and Cell Sorting Laboratory at



347 North Carolina State University (NCSU) for their assistance with cell sorting. Images in this  
348 manuscript were generated using the instruments and services at the Cellular and Molecular  
349 Imaging Facility (CMIF) at NCSU. Next-generation sequencing was performed by the Genomic  
350 Sciences Laboratory (GSL) at NCSU.

### 351 **Funding**

352 This work was supported by an NSF GRF (DGE-1252376) awarded to NMC and APF. EB is  
353 supported by a GAAN Fellowship in Molecular Biotechnology (grant #P200A160061). ARS was  
354 supported by the Donald Kennedy Fellowship and NIH graduate training grant  
355 NIH5T32GM007276 to Stanford University. PJS was supported by an Integrated Molecular  
356 Plant Systems Research Experience for Undergraduates (IMPS REU) grant awarded to NCSU  
357 DCB is an investigator of the Howard Hughes Medical Institute. Research in the RS lab was  
358 funded by an NSF CAREER grant (MCB-1453130).

### 359 **Supplementary Information**

360 Supplementary figures, tables, and equations are included in the Supplementary Information  
361 PDF.



364 **Figure 1. Distribution of cell-specific and cell-ubiquitous genes within the Arabidopsis root**  
365 **stem cell niche.** (A) (left) Schematic of the Arabidopsis root stem cell niche. CEI – cortex  
366 endodermis initials (blue); Protophlo- protophloem (pink); Epi/LRC – epidermis/lateral root cap  
367 initials (green); CSCs – columella stem cells (purple); Xyl – xylem initials (orange); QC –  
368 quiescent center (yellow). (left) GFP marker lines used to transcriptionally profile stem cells.  
369 SCN – stem cell niche; Scale bar = 20 $\mu$ m. (B) 3D principal component analysis (PCA) of the  
370 stem cell transcriptional profiles. The x, y, and z axis represent the three largest sources of  
371 variation (i.e. three largest principal components) of the dataset. Small spheres are biological  
372 replicates, large spheres are centroids. Red – Non stem cells (NSCs); Brown – SCN; Blue – CEI;  
373 Pink – Protophlo; Green – Epi/LRC; Purple – CSCs; Orange – Xyl; Yellow – QC; (C)  
374 Distribution of the 9266 stem cell-enriched genes across the stem cell niche. Enrichment criteria  
375 are q-value < 0.05 (from PoissonSeq) and fold change in expression > 2.

376

A

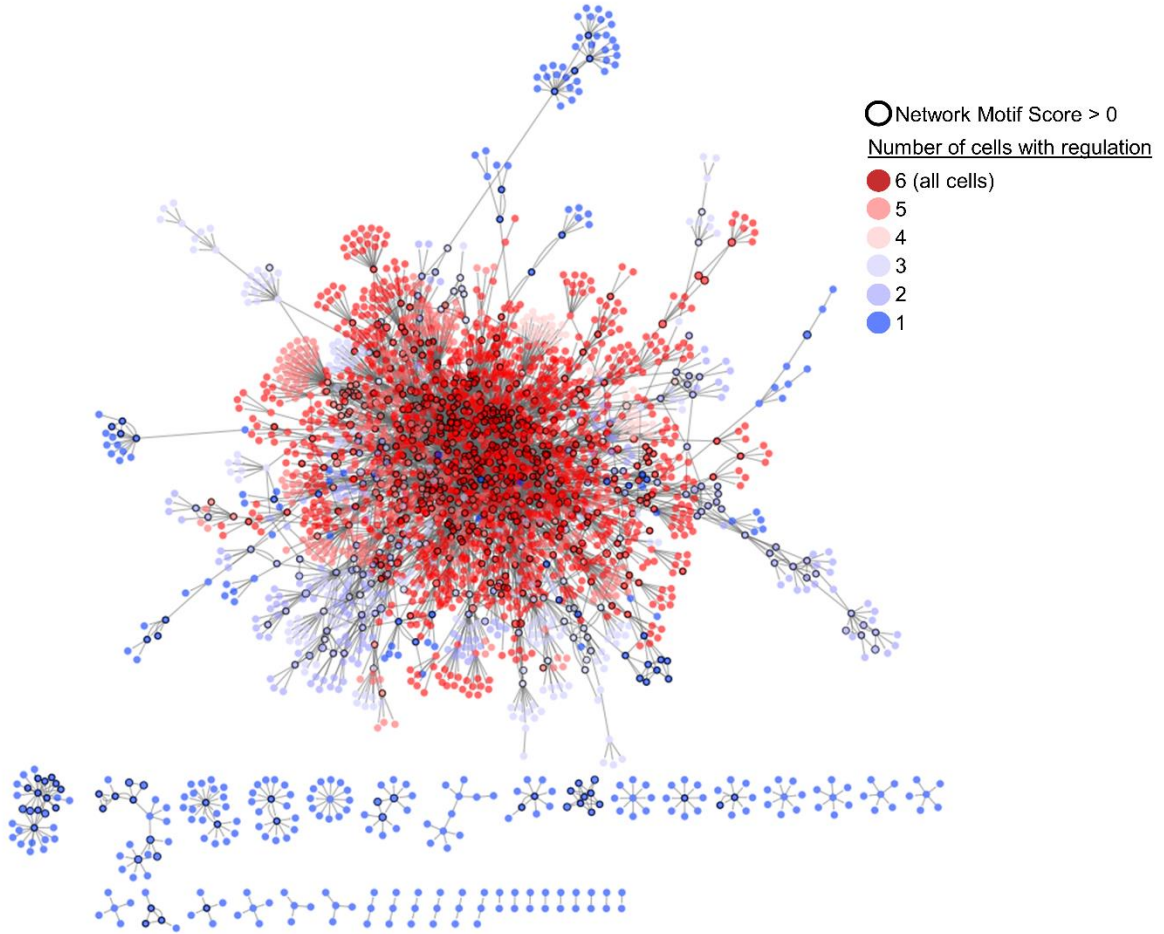

B

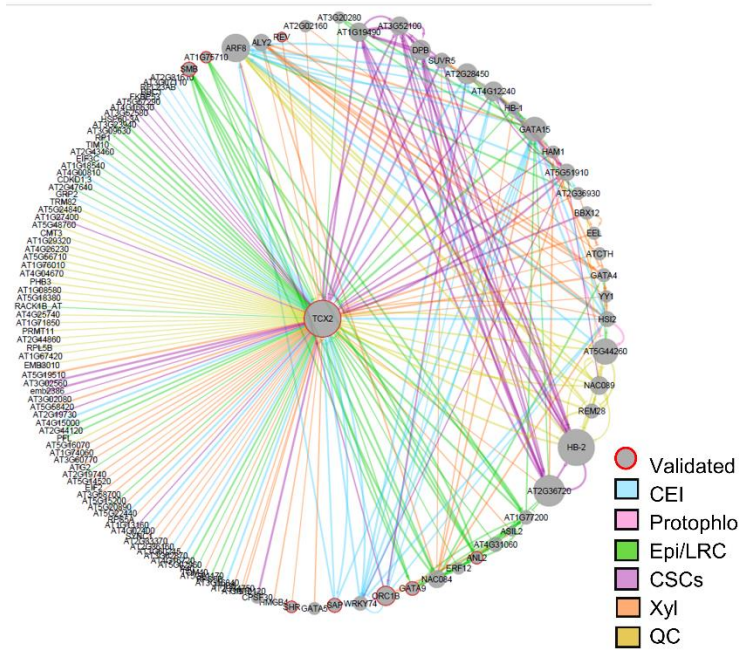

C

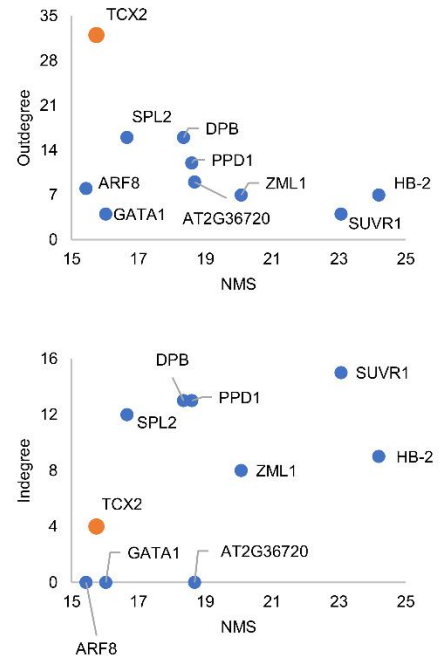

378 **Figure 2. Gene regulatory network (GRN) of the stem cell-enriched genes connects cell-**  
379 **specific and cell-ubiquitous hub genes.** (A) Inferred GRN of 2982 out of the 9266 stem cell-  
380 enriched genes. Genes are colored based on the number of genes in which they are enriched, with  
381 red genes (>3 enriched cells) considered cell-ubiquitous and blue genes ( $\leq 3$  enriched cells)  
382 considered cell-specific. Black outlines represent hub genes which have a normalized motif score  
383 (NMS) > 0. Arrows represent predicted activation, bars inferred repression, and circles no  
384 inferred sign. (B) First-neighbor GRN of TCX2. Gene size represents the NMS score. Red  
385 borders represent the genes which were biologically validated. Edge colors represent the cell in  
386 which the regulation is inferred. Blue – CEI; Pink – Protophlo; Green – Epi/LRC; Purple –  
387 CSCs; Orange – Xyl; Yellow – QC. (C) Outdegree (top plot) and indegree (bottom plot) vs NMS  
388 score of the genes with the top 10 NMS scores in (A). TCX2 is highlighted in orange.

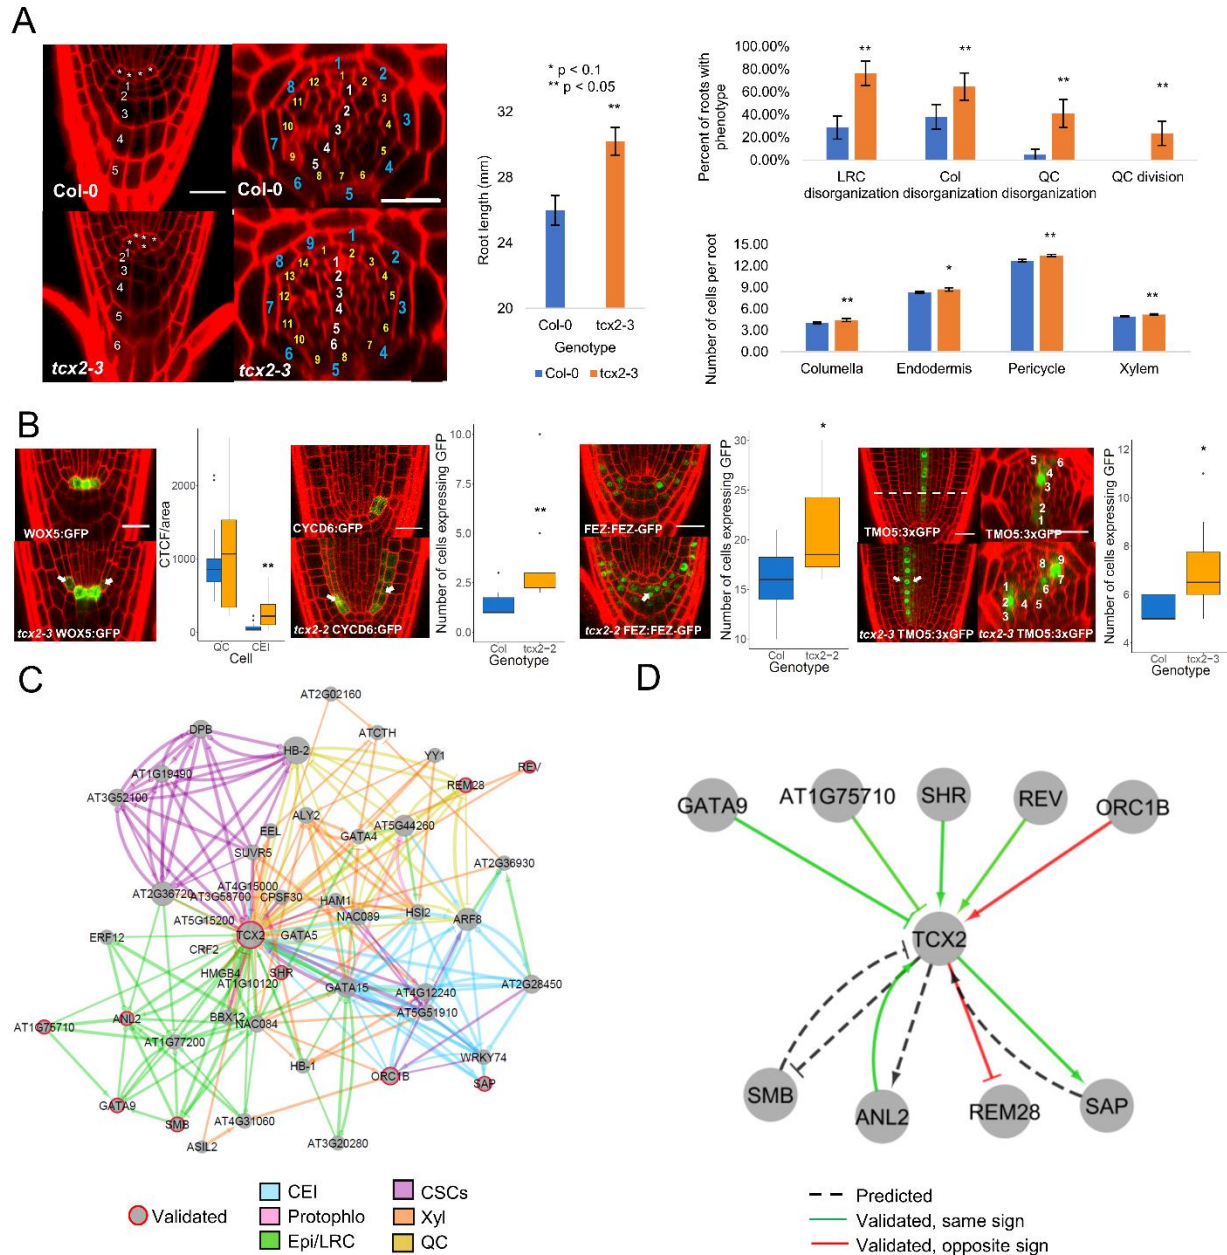

389

390 **Figure 3. TCX2 controls stem cell division through cell-specific regulators and targets. (A)**  
 391 (Left panel) Medial longitudinal (left) and radial (right) sections of 5 day old WT (top) and *tcx2*  
 392 mutant (bottom) plants. In medial longitudinal sections, \* labels QC cells and numbers denote  
 393 columella cell files. In radial sections, white numbers denote xylem cells, yellow pericycle, and  
 394 blue endodermis. (Middle panel) Length of 7 day old WT (blue) and *tcx2* mutant (orange) roots.  
 395 (Right panel) Quantification of stem cell phenotypes (top plot) and number of cell files (bottom  
 396 plot) in 5 day old WT (blue) and *tcx2* mutant (orange) roots. \* denotes  $p < 0.1$ , \*\* denotes  $p <$   
 397  $0.05$ , Wilcoxon test. Error bars denote SEM. (B) (left panels) Medial longitudinal sections of 5  
 398 day old WOX5:GFP (left), CYCD6:GFP (second from left), FEZ:FEZ-GFP (third from left), and  
 399 TMO5:3xGFP (right) in WT (top) and *tcx2* mutant (bottom) plants. For TMO5:3xGFP, a radial

400 section (middle) is also shown taken at the location of the white, dashed line. (right panels)  
 401 Quantification of GFP in WT (blue) and *tcx2* mutant (orange) plants. Black dots represent  
 402 outliers. (C) First neighbor TF network of TCX2. Gene size represents the NMS score. Red  
 403 borders represent the genes which were biologically validated. Edge colors represent the cell in  
 404 which the regulation is inferred. Blue – CEI; Pink – Protophlo; Green – Epi/LRC; Purple –  
 405 CSCs; Orange – Xyl; Yellow – QC. Arrows represent predicted activation, bars inferred  
 406 repression, and circles no inferred sign. (D) Validated first-neighbor TFs of TCX2. Dashed lines  
 407 were predicted in the GRN but not validated. Green (red) lines represent validated regulations  
 408 that were found (were not found) to agree with the predicted sign.

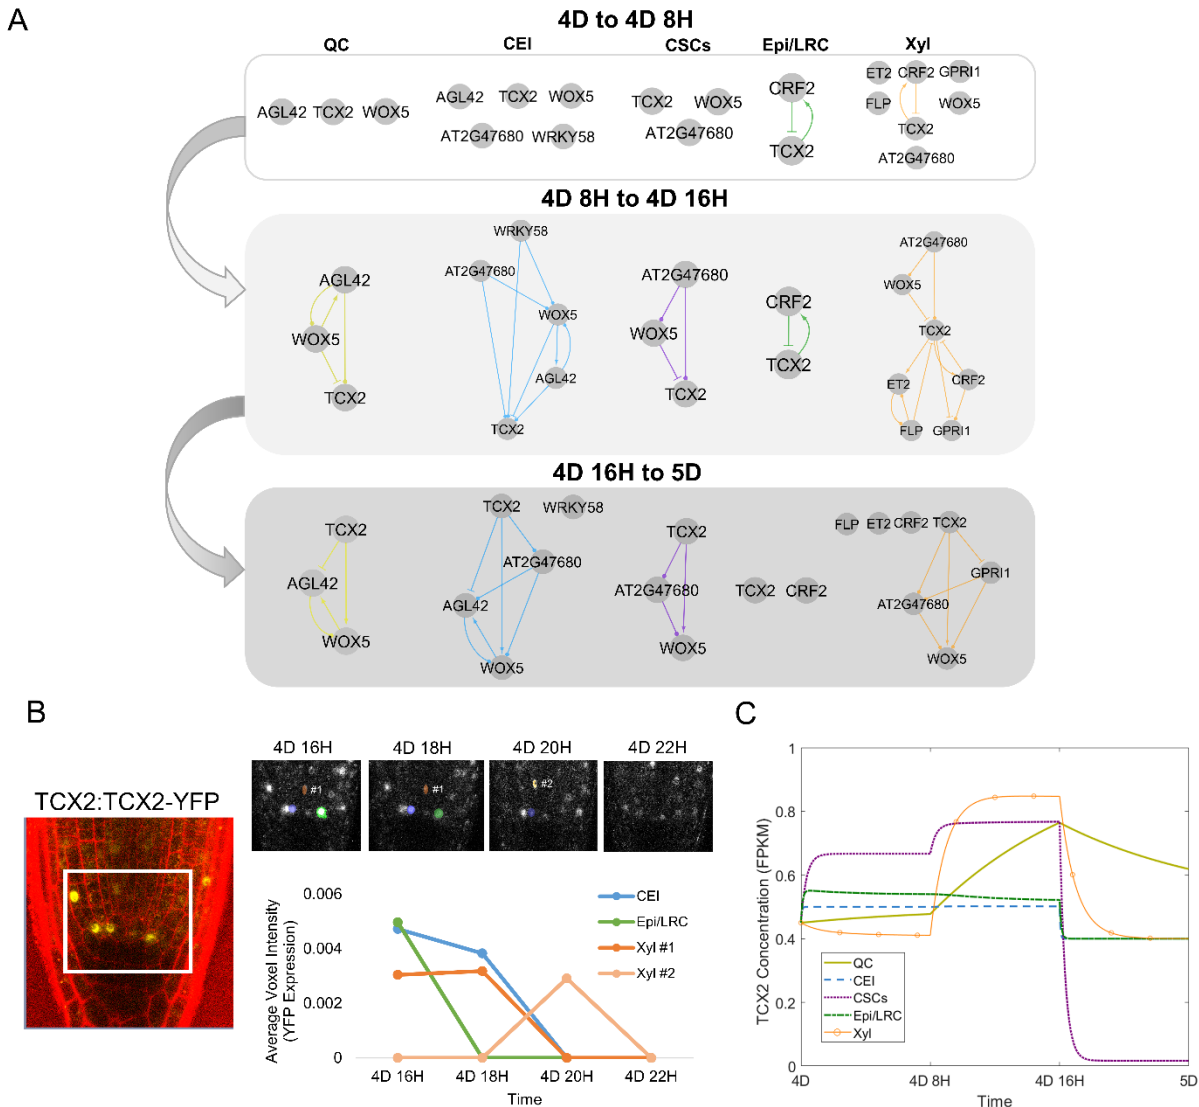

409

410 **Figure 4. Mathematical modeling of TCX2 network predicts timing of cell division.** (A)  
 411 TCX2 first neighbor TF networks predicted using RTP-STAR on the stem cell time course for 4  
 412 day (4D) to 4 days 8 hours (4D 8H) (top), 4D 8H to 4D 16H (middle), and 4D 16H to 5D  
 413 (bottom). Networks are separated based on the cell type the genes are expressed in: QC (yellow),  
 414 CEI (blue), CSCs (purple), Epi/LRC (green), Xyl (orange). Arrows represent predicted  
 415 activation, bars inferred repression, and circles no inferred sign. (B) (left) Representative image

416 of TCX2:TCX2-YFP at 4D 16H. White box represents the stem cell niche where cells were  
417 tracked over time. (right, top) YFP-positive cells tracked every 2 hours from 4D 16H (left) to 4D  
418 20H (right). Stem cells that were tracked are marked in blue (CEI), green (Epi/LRC), and orange  
419 (Xyl). Two Xyl cells were tracked, #1 and #2. All of these 4 stem cells had no measurable YFP  
420 expression at 4D 22H. (right,bottom) Quantification of YFP expression in tracked cells. (C) ODE  
421 model prediction of cell-specific TCX2 expression from 4D to 5D. FPKM: fragments per  
422 kilobase per million mapped reads.

423



424 **References**

- 425 1. Alessio, A. C. D. *et al.* A systematic approach to identify candidate transcription factors  
426 that control cell identity. *Stem Cell Reports* **5**, 763–775 (2015).
- 427 2. Morris, S. A. & Daley, G. Q. A blueprint for engineering cell fate : current technologies to  
428 reprogram cell identity. *Cell Res.* **23**, 33–48 (2013).
- 429 3. Bulstrode, H. *et al.* Elevated FOXG1 and SOX2 in glioblastoma enforces neural stem cell  
430 identity through transcriptional control of cell cycle and epigenetic regulators. *Genes Dev.*  
431 **31**, 1–17 (2017).
- 432 4. Vierbuchen, T. & Wernig, M. Molecular Roadblocks for Cellular Reprogramming. *Mol.*  
433 *Cell* **47**, 827–838 (2012).
- 434 5. Graf, T. & Enver, T. Forcing cells to change lineages. *Nature* **462**, 587–594 (2009).
- 435 6. Sancho-Martinez, I., Baek, S. H., Carlos, J. & Belmonte, I. Lineage conversion  
436 methodologies meet the reprogramming toolbox. *Nat. Cell Biol.* **14**, 892–899 (2012).
- 437 7. Clevers, H., Loh, K. M. & Nusse, R. An integral program for tissue renewal and  
438 regeneration: Wnt signaling and stem cell control. *Science (80- )*. **346**, 1248012 (2014).
- 439 8. Es, J. H. Van *et al.* Dll1 + secretory progenitor cells revert to stem cells upon crypt  
440 damage. *Nat. Cell Biol.* **14**, 1099–1104 (2012).
- 441 9. Takahashi, K. *et al.* Induction of Pluripotent Stem Cells from Adult Human Fibroblasts by  
442 Defined Factors. *Cell* **131**, 861–872 (2007).
- 443 10. Vaquerizas, J. M., Kummerfeld, S. K., Teichmann, S. A. & Luscombe, N. M. A census of  
444 human transcription factors: function, expression and evolution. *Nat. Rev. Genet.* **10**, 252–  
445 263 (2009).
- 446 11. de Luis Balaguer, M. A., Spurney, R. J., Clark, N. M., Fisher, A. P. & Sozzani, R.  
447 TuxNet: A simple interface to process RNA sequencing data and infer gene regulatory  
448 networks. *bioRxiv* 337147 (2018).
- 449 12. Fisher, A. P., Clark, N. M. & Sozzani, R. Positive feedback and feedforward loops  
450 between PERIANTHIA, WUSCHEL-RELATED HOMEODOMAIN 5 and GRF-  
451 INTERACTING FACTOR 1 modulate gene expression and function in the Arabidopsis  
452 root. *bioRxiv* 439851 (2018).
- 453 13. Alon, U. Network motifs: theory and experimental approaches. *Nat. Rev. Genet.* **8**, 450–  
454 461 (2007).
- 455 14. Milo, R., Shen-Orr, S., Itzkovitz, S. & Kashtan, N. Network Motifs: Simple Building  
456 Blocks of Complex Networks. *Science (80- )*. **298**, (2002).
- 457 15. Ingram, P. J., Stumpf, M. P. H. & Stark, J. Network motifs: Structure does not determine  
458 function. *BMC Genomics* **7**, 1–12 (2006).
- 459 16. Simmons, A. R., Davies, K. A., Wang, W., Liu, Z. & Bergmann, D. C. SOL1 and SOL2  
460 Regulate Fate Transition and Cell Divisions in the Arabidopsis Stomatal Lineage. *bioRxiv*

- 461 394940 (2018).
- 462 17. Sadasivam, S. & Decaprio, J. A. The DREAM complex: master coordinator of cell cycle-  
463 dependent gene expression. *Nat. Rev. Cancer* **13**, 585–595 (2013).
- 464 18. Schmit, F., Cremer, S. & Gaubatz, S. LIN54 is an essential core subunit of the DREAM /  
465 LINC complex that binds to the cdc2 promoter in a sequence-specific manner. *FEBS J.*  
466 **276**, 5703–5716 (2009).
- 467 19. Sarkar, A. K. *et al.* Conserved factors regulate signalling in Arabidopsis thaliana shoot  
468 and root stem cell organizers. *Nature* **446**, 811–814 (2007).
- 469 20. Sozzani, R. *et al.* Spatiotemporal regulation of cell-cycle genes by SHORTROOT links  
470 patterning and growth. *Nature* **466**, 128–132 (2010).
- 471 21. Cruz-Ramirez, A. *et al.* A Bistable Circuit Involving SCARECROW-  
472 RETINOBLASTOMA Integrates Cues to Inform Asymmetric Stem Cell Division. *Cell*  
473 **150**, 1002–1015 (2012).
- 474 22. Willemsen, V. *et al.* The NAC Domain Transcription Factors FEZ and SOMBRERO  
475 Control the Orientation of Cell Division Plane in Arabidopsis Root Stem Cells. *Dev. Cell*  
476 **15**, 913–922 (2008).
- 477 23. De Rybel, B. *et al.* A bHLH Complex Controls Embryonic Vascular Tissue Establishment  
478 and Indeterminate Growth in Arabidopsis. *Dev. Cell* **24**, 426–437 (2013).
- 479 24. Helariutta, Y. *et al.* The SHORT-ROOT Gene Controls Radial Patterning of the  
480 Arabidopsis Root through Radial Signaling. *Cell* **101**, 555–567 (2000).
- 481 25. Clark, N. M. *et al.* Tracking transcription factor mobility and interaction in Arabidopsis  
482 roots with fluorescence correlation spectroscopy. *Elife* **5**, e14770 (2016).
- 483 26. Byzova, M. V *et al.* Arabidopsis STERILE APETALA , a multifunctional gene regulating  
484 inflorescence , flower , and ovule development. *Genes Dev.* **2**, 1002–1014 (1999).
- 485 27. Carlsbecker, A. *et al.* Cell signalling by microRNA165/6 directs gene dose-dependent root  
486 cell fate. *Nature* **465**, 316–321 (2010).
- 487 28. Clark, N. M. *et al.* Cell type-specific differences in protein complex stoichiometry and  
488 transcriptional regulation affect the timing of stem cell division. *bioRxiv* 439331 (2018).
- 489 29. Gallagher, K. L., Paquette, A. J., Nakajima, K. & Benfey, P. N. Mechanisms Regulating  
490 SHORT-ROOT Intercellular Movement. *Curr. Biol.* **14**, 1847–1851 (2004).
- 491 30. Sabatini, S., Heidstra, R., Wildwater, M. & Scheres, B. SCARECROW is involved in  
492 positioning the stem cell niche in the Arabidopsis root meristem. *Genes Dev.* **17**, 354–358  
493 (2003).
- 494 31. Rodriguez-Villalon, A., Gujas, B., Wijk, R. Van, Munnik, T. & Hardtke, C. S. Primary  
495 root protophloem differentiation requires balanced phosphatidylinositol-4 , 5-biphosphate  
496 levels and systemically affects root branching. *Development* **142**, 1–10 (2015).
- 497 32. Nawy, T. *et al.* Transcriptional Profile of the Arabidopsis Root Quiescent Center. *Plant*

- 498            *Cell* **17**, 1908–1925 (2005).
- 499    33.    Schlereth, A. *et al.* MONOPTEROS controls embryonic root initiation by regulating a  
500            mobile transcription factor. *Nature* **464**, 913–916 (2010).
- 501    34.    Clark, N. M., Fisher, A. P. & Sozzani, R. Identifying Differentially Expressed Genes  
502            Using Fluorescence-Activated Cell Sorting ( FACS ) and RNA Sequencing from Low  
503            Input Samples. in *Computational Cell Biology: Methods and Protocols* **1819**, 139–151  
504            (2018).
- 505    35.    Li, J., Witten, D. M., Johnstone, I. M. & Tibshirani, R. Normalization , testing , and false  
506            discovery rate estimation for RNA-sequencing data. *Biostatistics* **13**, 523–538 (2012).
- 507    36.    Heberle, H., Meirelles, G. V, da Silva, F. R., Telles, G. P. & Mignhim, R. InteractiVenn: a  
508            web-based tool for the analysis of sets through Venn diagrams. *BMC Bioinformatics* **16**,  
509            169 (2015).
- 510    37.    Buckner, E. *et al.* Tracking Gene Expression via Light Sheet Microscopy and Computer  
511            Vision in Living Organisms. *40th Int. Conf. IEEE EMBS* 818–821 (2018).
- 512    38.    Clark, N. M. & Sozzani, R. Measuring Protein Movement, Oligomerization State, and  
513            Protein–Protein Interaction in Arabidopsis Roots Using Scanning Fluorescence  
514            Correlation Spectroscopy (Scanning FCS). in *Plant Genomics: Methods and Protocols*  
515            **1610**, 251–266 (2017).
- 516    39.    Sobol, I. M. Global sensitivity indices for nonlinear mathematical models and their Monte  
517            Carlo estimates. *Math. Comput. Simul.* **55**, 271–280 (2001).
- 518    40.    Saltelli, A. *et al.* Variance based sensitivity analysis of model output . Design and  
519            estimator for the total sensitivity index. *Comput. Phys. Commun.* **181**, 259–270 (2010).
- 520
