## 1 **Stem-cell-ubiquitous genes spatiotemporally coordinate division through regulation of** 2 **stem-cell-specific gene networks**

3 Natalie M Clark<sup>1,2,a</sup>, Eli Buckner<sup>3,†</sup>, Adam P Fisher<sup>1,†</sup>, Emily C Nelson<sup>1,†</sup>, Thomas T Nguyen<sup>1,†</sup>,  
4 Abigail R Simmons<sup>4</sup>, Maria A de Luis Balaguer<sup>1</sup>, Tiara Butler-Smith<sup>1</sup>, Parnell J Sheldon<sup>1,5</sup>,  
5 Dominique C Bergmann<sup>4,6</sup>, Cranos M Williams<sup>3</sup>, Rosangela Sozzani<sup>1,2,\*</sup>

- 6 1. Department of Plant and Microbial Biology, North Carolina State University, Raleigh,  
7 NC 27695
- 8 2. Biomathematics Graduate Program, North Carolina State University, Raleigh, NC 27695
- 9 3. Department of Electrical and Computer Engineering, North Carolina State University,  
10 Raleigh, NC 27695
- 11 4. Department of Biology, Stanford University, Stanford, CA 94305
- 12 5. Department of Biology, Denison University, Granville, OH 43023
- 13 6. Howard Hughes Medical Institute (HHMI), Stanford University, Stanford, CA 94305

14  
15 \* Correspondence to Rosangela Sozzani, [ross\\_sozzani@ncsu.edu](mailto:ross_sozzani@ncsu.edu)

16 † These authors contributed equally to this work

17 a) Current address: Department of Plant Pathology and Microbiology, Iowa State University,  
18 Ames, IA 50011

### 19 **Abstract**

20 Stem cells are responsible for generating all of the differentiated cells, tissues, and organs in a  
21 multicellular organism and, thus, play a crucial role in cell renewal, regeneration, and  
22 organization. A number of stem cell type-specific genes have a known role in stem cell  
23 maintenance, identity, and/or division. Yet, how genes expressed across different stem cell types,  
24 referred here as stem-cell-ubiquitous genes, contribute to stem cell regulation is less understood.  
25 Here, we find that, in the Arabidopsis root, a stem-cell-ubiquitous gene, TESMIN-LIKE CXC2  
26 (TCX2), controls stem cell division by regulating stem cell-type specific networks. Development  
27 of a mathematical model of TCX2 expression allowed us to show that TCX2 orchestrates the  
28 coordinated division of different stem cell types. Our results highlight that genes expressed  
29 across different stem cell types ensure cross-communication among cells, allowing them to  
30 divide and develop harmonically together.

### 31 **Introduction**

32 Stem cells asymmetrically divide to replenish the stem cell and produce a daughter cell that will  
33 go on to differentiate into a specialized cell type. Various mechanisms have been proposed for  
34 how pluripotency is maintained, such as signaling pathways within the stem cell niche (SCN)  
35 that restrict differentiation, predetermined lineages which ensure stem cells are continuously  
36 formed, and cell plasticity which allows differentiated cells to revert to a stem-like state<sup>1-4</sup>.  
37 However, most of the pathways that have been shown to maintain pluripotency use local  
38 mechanisms, such as short-range signaling, DNA methylation, and chromatin remodeling, that  
39 only act on the dividing cell and/or the directly adjacent cells<sup>5-8</sup>. There are likely other networks,  
40 upstream of these local mechanisms, which are global in nature and allow for cross-  
41 communication across different cell populations.

42 The Arabidopsis root provides an excellent model system for uncovering these global regulatory  
43 networks. The root SCN is well-defined and located at the tip of the root, and as the stem cells  
44 asymmetrically divide, the differentiated cells are pushed up the root, resulting in a temporal axis  
45 where older cells are more shootward and younger cells are more rootward. Crucially, the  
46 movement of cells in the root is constrained due to cell walls, and cell-to-cell signals travel via  
47 the plasmodesmata, which are small channels in the cell walls<sup>9</sup>. This lack of cell movement  
48 coupled with well-defined marker lines that label specific cell populations<sup>10,11</sup> allows us to study  
49 stem cell identity, division, and maintenance in an isolated environment.

50 Here, we identified genes expressed specifically (in one stem cell type) and ubiquitously (in all  
51 stem cell types) that control stem cell division and maintenance in the Arabidopsis root. We first  
52 transcriptionally profiled the individual stem cells using spatially well-defined GFP marker lines  
53 and found that near half of the stem cell-enriched genes are expressed in only one stem cell type,  
54 while the other half are expressed in multiple cell types. We next used Gene Regulatory Network  
55 (GRN) inference to predict that there are not only stem-cell-specific gene networks but also an  
56 upstream network that regulates all of the different stem cells. Given that most known  
57 mechanisms for maintaining stem cell identity and plasticity are local in nature, we focused on  
58 identifying genes expressed in all the stem cells (hereinafter referred to as a stem-cell-ubiquitous  
59 gene) that regulates aspects of stem cell maintenance. Using our network prediction, we found  
60 that TESMIN-LIKE CXC 2 (TCX2), a member of the family of CHC proteins which are  
61 homologues of components of the DREAM cell-cycle regulatory complex in animals<sup>12</sup>, is a key  
62 regulator of stem cell division. Further, using Ordinary Differential Equation (ODE) modeling,  
63 we show that using the dynamics of TCX2 expression we could predict the timing of stem cell  
64 division. Our results provide evidence that genes that participate in global regulatory pathways  
65 which span many, different cell types are important for controlling stem cell division and  
66 maintenance.

## 67 **Results**

### 68 **Stem-cell-type-specific and stem-cell-ubiquitous transcriptional profile control stem cell** 69 **pluripotency**

70 To understand how and whether stem-cell-ubiquitous genes contribute to cell identity,  
71 maintenance, and/or division, we performed gene expression analysis of the stem cells in the  
72 Arabidopsis root, as this offers a tractable system given its 3-dimensional radial symmetry and  
73 temporal information encoded along its longitudinal axis. To this end, seven root stem cell  
74 markers (Figure 1A), as well as a non-stem cell control (i.e., a population of cells from the root  
75 meristem excluding most of the stem cells), were used to identify stem cell-enriched genes, and  
76 among those, stem-cell-ubiquitous and stem-cell-specific genes, as it has been shown that there  
77 is a correlation between expression levels and functionality in specific cell types<sup>1,13</sup>  
78 (Supplementary Figure 1, see Methods). Notably, we found that the expression profiles of our  
79 markers together with known stem cell genes, agree with their known expression domains,  
80 supporting that our transcriptional profiles are specific to each stem cell population  
81 (Supplementary Figure 1). To measure transcriptional differences between the stem cells and the  
82 non-stem cells, we next performed a Principal Component Analysis (PCA.) Looking at the top 3  
83 principal components (50.6% of the variation in the data), the PCA shows that the non-stem cell  
84 samples (red) are distant from all of the stem cell populations, suggesting that the stem cells have  
85 a different transcriptional signature than the non-stem cells (Figure 1B). Accordingly, when we

86 performed differential expression analysis on these data, we found that 9266 (28% of genes) are  
87 significantly enriched ( $q < 0.06$  and fold change  $> 2$ ) in at least one stem cell population  
88 compared to the non-stem cells and considered these genes the stem cell-enriched genes (see  
89 M&M and Supplemental Table 1). Thus, this approach allowed us to identify core stem cell  
90 genes, as functionally important genes are often enriched in the specific cell populations they  
91 control<sup>1,13</sup>.

92 While the PCA gives us a general idea of how many genes are cell-specific vs cell-ubiquitous, it  
93 reduces the dimensionality of the problem to the three largest components of variance.  
94 Consequently, we would expect some genes been differentially enriched across all of the stem  
95 cell populations. Indeed, when we performed differential expression analysis on the 9266 stem  
96 cell-enriched genes (see Methods), we find that 2018 genes (21.8% of the stem cell-enriched  
97 genes, hereinafter referred to as the stem-cell-ubiquitous genes) are enriched in at least 4 of the 6  
98 unique stem cell types, with 569 of these 2018 (6.1% of the stem cell-enriched genes) enriched in  
99 5 or 6 cell types (Figure 1C). Moreover, as each stem cell population clusters independently from  
100 the others in the PCA, we identified 7248 genes (78.2% of the stem cell-enriched genes),  
101 hereinafter referred to as the stem-cell-specific genes, enriched in 3 or less stem cell types, with  
102 4331 of those 7248 genes (46.7% of the stem cell-enriched genes) enriched in only 1 stem cell  
103 type. This suggests that each specific stem cell type has its own, unique transcriptional signature.

#### 104 **Both stem-cell-specific and stem-cell-ubiquitous genes are predicted to be important stem** 105 **cell regulators**

106 Given the separation between stem-cell-ubiquitous genes and stem-cell-specific genes, we next  
107 wanted to know if these two groups of genes have seemingly separated functions or, for  
108 example, if stem-cell-ubiquitous genes modulate stem-cell-specific gene expression to  
109 orchestrate coordinated processes between different cell types. To test the latter hypothesis, in  
110 which stem-cell-specific genes are important for regulating cell type-specific aspects (e.g cell  
111 identity), but are regulated by stem-cell-ubiquitous genes so that stem cell maintenance and  
112 divisions are tightly coordinated, we used Gene Regulatory Network (GRN) inference and  
113 predicted the relationships between all 9266 genes enriched in the stem cells. We developed a  
114 machine-learning, regression tree approach to infer dynamic networks from steady state,  
115 replicate data (see Methods). Our inferred GRN found regulations among 2982 (32.2%) of the  
116 stem cell-enriched genes and predicted that the stem-cell-ubiquitous (red) genes are located in  
117 the center of the network, which represents the beginning of the regulatory cascade, and are  
118 highly connected to each other (Figure 2A). Meanwhile, the cell-specific (blue) genes mostly  
119 regulate each other within the same cell type and are located on the outside of the network,  
120 therefore downstream of the cell-ubiquitous genes (Figure 2A). This suggests that the cell-  
121 ubiquitous genes are potentially involved in coordinating processes between different stem cells  
122 through the regulation of cell-specific genes.

123 We next wanted to identify if the most biologically important genes in the network were cell-  
124 specific, cell-ubiquitous, or both, as most results in animals assume that core TFs must be  
125 expressed in a cell-specific manner<sup>1</sup>. To predict biological significance, we developed a Network  
126 Motif Score (NMS) to quantifies the number of times each gene appears in certain network  
127 motifs, such a feedback and feedforward loops (see Methods). These motifs were chosen as they  
128 were significantly enriched in our biological network versus a random network of the same size,  
129 and have been shown to often contain genes that have important biological functions<sup>14-16</sup>

130 (Supplementary Figure 2). In our inferred GRN, we found that 737 (24.7%) of the 2982 genes  
131 have an NMS > 0, meaning they appear in at least one of the network motifs. To validate the  
132 NMS, we found that 22 known stem cell regulators had scores in the top 50% of genes, with 10  
133 of those 22 (45.5%) in the top 25% of genes, supporting that high NMS scores are correlated  
134 with stem cell function (Supplemental Table 2). Further, 510 (69.2%) and 217 (31.8%) of these  
135 genes are cell-ubiquitous (4 or more enriched stem cells, red) and cell-specific (3 or less enriched  
136 stem cells, blue), respectively (Figure 2A). Given that more cell-ubiquitous genes have higher  
137 importance scores in our dataset, we focused our downstream analysis on identifying a stem-cell-  
138 ubiquitous gene with characteristics of a functionally important regulator.

### 139 **TCX2 is an important stem-cell-ubiquitous regulator controlling stem cell division and** 140 **identity**

141 When we began to examine the stem-cell-ubiquitous regulators, we found that TESMIN-LIKE  
142 CXC 2 (TCX2, also known as SOL2), a known homologue of the LIN54 DNA-binding  
143 component of the mammalian DREAM complex which regulates the cell cycle and the transition  
144 from cell quiescence to proliferation<sup>12,17,18</sup>, had the ninth highest NMS (top 1.2% of genes). This  
145 suggests that TCX2 could have an important role across all of the stem cells. To further support  
146 the biological significance of TCX2, we examined the subnetwork of its first neighbors (i.e.,  
147 genes predicted to be either directly upstream or downstream of TCX2). We found that TCX2 is  
148 enriched in 5 out of the 6 stem cell types and predicted to regulate at least one gene in all of  
149 those cell types, supporting that TCX2 could be a stem-cell-ubiquitous regulator that controls  
150 stem-cell-specific core genes (Figure 2B). In addition, when compared to the genes with the top  
151 10 NMS, TCX2 has the highest outdegree (number of edges going out) and low indegree  
152 (number of edges coming in), suggesting that TCX2 could orchestrate coordinated stem cell  
153 division as suggested by the function of its mammalian homologue<sup>12,17,18</sup>.

154 If TCX2 is indeed a key regulator for stem cell maintenance and division, we would expect that a  
155 change in its expression would cause a developmental phenotype related to these aspects. To test  
156 this hypothesis, we obtained two knockdown (*tcx2-1*, *tcx2-2*) and one knockout (*tcx2-3*) mutants  
157 of TCX2, which all show similar phenotypes (Figure 3A, Supplementary Figure 3). Importantly,  
158 we observed in *tcx2-3* an overall disorganization of the stem cells, including aberrant divisions in  
159 the Quiescent Center (QC), columella, endodermis, pericycle, and xylem cells (Figure 3A).  
160 Additionally, *tcx2-3* mutants showed longer roots due to a higher number in meristematic cell/  
161 higher proliferation (Figure 3A, Supplementary Figure 3). Notably, similar phenotypes related to  
162 cell divisions have been observed also in the stomatal lineage of *tcx2 sol1* double mutants<sup>12</sup>. To  
163 further investigate TCX2's role in stem cell division, we crossed the cell division (G2/M phase)  
164 marker CYCB1;1:CYCB1;1-GFP<sup>19,20</sup> into the *tcx2* mutant and performed temporal tracking of  
165 the GFP signal over time. We first found that average CYCB1;1 expression was higher in the  
166 *tcx2* mutant compared to WT. Second, we separated cells expressing CYCB1;1 into 3 categories:  
167 low, intermediate, and high expression. We found that significantly more cells in the *tcx2* mutant  
168 have high CYCB1;1 expression, while significantly fewer cells have low CYCB1;1 expression.  
169 Finally, we calculated the number of consecutive time points each cell shows CYCB1;1  
170 expression. We found that significantly fewer cells in the *tcx2* mutant had 2 consecutive  
171 timepoints with CYCB1;1 expression (Supplementary Figure 4). All of these alterations in  
172 CYCB1;1 expression in the *tcx2* mutant suggest that reduction of TCX2 expression correlates  
173 with more actively dividing cells. Taken together, these results suggest that TCX2, as a stem-  
174 cell-ubiquitous gene, regulates stem cell divisions across different stem cell populations.

175 We hypothesized that TCX2 controls stem cell division by regulating important, cell type-  
176 specific genes. Notably, all of our stem cell markers, in addition to being expressed only to one  
177 stem cell type, are known to have functions in stem cell regulation<sup>21-25</sup>. Thus, we crossed the  
178 marker lines for the Quiescent Center (QC; WOX5:GFP), Cortex Endodermis Initials (CEI;  
179 CYCD6:GFP), Epidermis/Lateral Root Cap Initials (Epi/LRC;FEZ:FEZ-GFP), and Xylem  
180 Initials (Xyl;TMO5:3xGFP) (Figure 1A) into the *tcx2-2* and *tcx2-3* mutant alleles (Figure 3B).  
181 Compared to WT, in a *tcx2* mutant the expression pattern of these markers is expanded.  
182 Specifically, the QC marker expands into the CEI, the CEI marker expands into the endodermis  
183 and cortex layers, the Epi/LRC marker expands into the Columella Stem Cells (CSCs), and the  
184 Xyl marker expands into the procambial cells (Figure 3B). This suggests that in the absence of  
185 TCX2 coordination of stem cell division and identity is unregulated through an unknown  
186 mechanism.

187 When we examined the predicted upstream regulators and downstream targets of TCX2, we  
188 found that 75% are predicted to be cell-specific (expressed in  $\leq 3$  stem cell types), suggesting that  
189 TCX2 could be regulated and it regulates targets in a cell type-specific manner. (Supplemental  
190 Table 3). Thus, to identify additional cell-specific regulators as well as targets of TCX2, we  
191 obtained mutants of the transcription factors (TFs) predicted to be TCX2's first neighbors (i.e.  
192 directly upstream or downstream) that also had high NMS scores (Figure 3C, Supplemental  
193 Table 3). Two of the genes, SHORTROOT (SHR), and SOMBRERO (SMB) have phenotypes in  
194 the stem cells of their loss-of-function mutants, while the loss-of-function mutant of STERILE  
195 APETALA (SAP) is homozygous sterile<sup>22,24,26-28</sup>. Additionally, a quadruple mutant of  
196 REVOLUTA (REV) together with three other xylem regulators results in missing xylem layers<sup>29</sup>.  
197 Further, we obtained loss-of-function mutants of GATA TRANSCRIPTION FACTOR 9  
198 (GATA9), AT1G75710, ORIGIN OF REPLICATION COMPLEX 1B (ORC1B),  
199 ANTHOCYANINLESS 2 (ANL2), and REPRODUCTIVE MERISTEM 28 (REM28), which  
200 showed root stem cell phenotypes (Figure 3C, Supplementary Figure 5). We were able to  
201 validate that TCX2 was differentially expressed ( $p < 0.05$ ) in *gata9*, *at1g75710*, *rev*, *orc1b*, and  
202 *anl2* mutants using qPCR as well as in the SHR overexpression line<sup>22</sup>. Further, we performed  
203 FACS coupled with RNA-Seq on the 4 marker lines (WOX5:GFP, CYCD6:GFP, FEZ:FEZ-  
204 GFP, and TMO5:3xGFP) that we crossed into the *tcx2* mutant to determine the effect of TCX2  
205 on its predicted downstream stem-cell-specific targets. In addition, we performed RNA-Seq on  
206 tissue from the stem cell area of the *tcx2* mutant (Supplemental Table 5). Using these data, we  
207 were able to validate that 77.78% of the predicted direct targets of TCX2 are differentially  
208 expressed in the *tcx2* mutant stem cells. Further, 41.54% of these edges are predicted in the  
209 correct cell type, and of those edges predicted in the correct cell type that had a predicted sign,  
210 58.33% of the edge signs are correctly predicted (slightly better than randomly assigning edge  
211 signs, which would have a 50% rate of success). To validate some of the direct interactions  
212 between TCX2 and its downstream targets, we mined a published DAP-Seq dataset from  
213 Arabidopsis leaves<sup>30</sup> and were able to confirm that TCX2 can directly bind 15.05% of its  
214 predicted direct targets (Figure 3C, Supplemental Table 4). Overall, these results suggest TCX2  
215 orchestrates coordinated stem cell divisions through stem-cell-specific regulatory cascades.

## 216 **The TCX2 regulatory network changes over time to regulate stem cell division**

217 Given that most of the validated upstream regulators of TCX2 are stem-cell-type specific  
218 (Supplemental Table 3), we propose that these cell-specific regulators modulate the dynamics of  
219 TCX2 expression in individual cell types. In turn, changes in TCX2 dynamics correlate with

220 changes in expression of its downstream targets (Figures 3C, 3D). Thus, we hypothesized that  
221 different dynamics of TCX2 in specific stem cells, as well as changes in TCX2 expression, could  
222 be used to predict when each stem cell population divides.

223 If TCX2 expression is dynamically changing over time in a cell-specific manner, we would  
224 predict that the TCX2 GRN also changes temporally. Specifically, we could expect that TCX2  
225 differentially regulates its targets in specific cell types at certain times depending on its  
226 expression levels. Thus, to determine if the TCX2 regulatory network changes over time, we first  
227 selected 176 genes of interest that were differentially expressed in the *tcx2* root tip sample  
228 (Supplementary Table 5) as well as enriched in the stem cells, as these are most likely to be the  
229 downstream of TCX2 across different stem cell populations. We inferred GRNs using a time  
230 course of the root meristem that is stem cell-enriched (hereinafter referred to as the stem cell  
231 time course, see Methods) to predict one network per time point (every 8 hours from 4 days to 6  
232 days). We found that genes in the first neighbor network of TCX2 have different predicted  
233 regulations depending on the time point. Specifically, most of the regulation to and from TCX2  
234 are predicted to occur between 4 days (4D) and 5 days (5D), which is the developmental time at  
235 which many stem cell divisions take place<sup>22</sup>. (Supplementary Figure 6). Thus, since our gene  
236 expression data suggest that loss of TCX2 function correlates with an increase in stem cell  
237 division, we hypothesized that most of the TCX2-regulated stem cell division is occurring  
238 between 4D 16H and 5D, time at which TCX2 expression decreases at least by 1.5 fold-change  
239 (Supplementary Figure 6).

240 To test how these time- and cell-specific GRNs affect TCX2 expression and therefore cell  
241 division, we built a mechanistic model of the GRNs predicted every 8 hours from 4D to 5D (see  
242 M&M and Supplementary Information). We used our stem cell time course to determine the cell-  
243 specific networks at each time point and constructed equations for each gene in the network  
244 (Figure 4A, Supplementary Figure 7). Unlike our GRN, which only predicts the regulations in  
245 each cell at each time point, our Ordinary Differential Equation (ODE) model converts the  
246 network prediction into a quantitative model of gene expression. Thus, this model allowed us to  
247 quantify how TCX2 dynamics change over time and to correlate significant changes in  
248 expression with cell division. Our model included the possibility of some of the proteins moving  
249 between cell types, as this is a known local signaling/ cell-to-cell communication mechanism<sup>27,31</sup>.  
250 Specifically, we used scanning Fluorescence Correlation Spectroscopy (Scanning FCS) and  
251 observed that TCX2 does not move between cells, thus suggesting a cell-autonomous function,  
252 while observed movement of WOX5<sup>32,33</sup> and CRF2/TMO3 between cells is in line with a non-  
253 cell-autonomous function (Supplementary Figure 8). As our sensitivity analysis predicted that  
254 the oligomeric state of TCX2 in the Xyl, diffusion coefficient of WOX5 from the CEI to the QC,  
255 and diffusion coefficient of WOX5 from the QC to the Xyl were three of the most important  
256 parameters in the model, we experimentally determined these parameters (Supplementary Figure  
257 8, Supplemental Table 6). Given that our network and time course data predict that TCX2-  
258 mediated cell division is tightly coordinated and controlled between 4D 16H and 5D, we wanted  
259 to ensure that we accurately measured TCX2 dynamics in this time period to produce the best  
260 predictive model of stem cell division. To this end, we quantified the expression of the  
261 TCX2:TCX2-YFP marker in different stem cells every 2 hours from 4D 18H to 4D 22H  
262 (hereinafter referred to as the YFP tracking data) (Figure 4B, see M&M). We then used the  
263 average expression of TCX2 in each cell at each time point to estimate parameters in our model  
264 (Supplemental Table 7). The result of this model is thus a spatiotemporal map of the expression

265 dynamics of TCX2 and its predicted first neighbors. Given that TCX2 expression has previously  
266 been shown to disappear 1-2 hours before stomatal division<sup>12</sup>, we reasoned that we could use our  
267 model of TCX2 expression to predict when stem cell division occurs in the root.

268 Our model predicts that there is a significant (fold-change > 1.5) increase in TCX2 expression  
269 specifically in the QC and Xyl between 4D 8H and 4D 16H. After this time, our model predicts  
270 that the expression of TCX2 in the QC does not significantly decrease and is significantly higher  
271 than in all of the actively dividing stem cells (Figure 4C, Supplemental Table 8). Given that the  
272 QC is relatively mitotically inactive, this suggests that high levels of TCX2 correlate with a lack  
273 of QC division. This prediction is supported by our YFP tracking data which shows that half of  
274 the QC cell clusters have either relatively constant or increased TCX2 expression between 4D  
275 16H and 5D (Supplementary Figure 9). Meanwhile, TCX2 expression is predicted to significantly  
276 decrease between 4D 16H and 5D in both the Xyl and CSCs, suggesting that these cells divide  
277 during this time. This prediction is also supported by our YFP tracking data showing that the  
278 majority of Xyl and CSCs cells have low TCX2 expression after 4D 20H (Supplementary Figure  
279 9). In contrast, the CEI and Epi/LRC show only a modest decrease in TCX2 expression between  
280 4D 16H and 5D. This could be due to only some of these cells dividing at that time, as our YFP  
281 tracking data shows a large amount of variation in TCX2 expression in these cell populations  
282 (Supplementary Figure 9). Taken together, our model and experimental data both suggest that  
283 TCX2 not only initiates the division of the actively dividing stem cells, but it also inhibits the  
284 division of the QC during the same timeframe, through an unknown mechanism. Further, our  
285 results allow us to narrow the timing of TCX2-induced stem cell division to a 4-hour window,  
286 between 4D 20H and 5D.

## 287 **Discussion**

288 Here, we unraveled the communication between stem-cell-specific and stem-cell-ubiquitous  
289 networks in the Arabidopsis root through a combination of transcriptomic profiling, GRN  
290 inference, biological validation, and mathematical modeling. Our stem cell transcriptional profile  
291 revealed that there is both a stem-cell-specific profile that likely provides the foundation for stem  
292 cell identity networks as well as a stem-cell-ubiquitous profile that encodes the unique properties  
293 shared by all stem cells, such as their ability to asymmetrically divide. Further, our GRN  
294 inference predicted that these stem-cell-specific and stem-cell-ubiquitous networks are  
295 connected, with the stem-cell-ubiquitous regulators potentially coordinating the downstream  
296 stem-cell-specific mechanisms.

297 Using our network motif score, we identified TCX2 as an important stem-cell-ubiquitous gene  
298 that regulates stem cell division by coordinating stem-cell-specific regulatory networks. We  
299 validated that TCX2 regulates stem-cell-specific genes through transcriptionally profiling some  
300 of the stem cell populations in the *tcx2* mutant, supporting that stem-cell-ubiquitous and stem-  
301 cell-specific genes work together to coordinate cell division. Specifically, we were able to  
302 validate that 77.78% of the predicted direct targets of TCX2 are differentially expressed in the  
303 *tcx2* mutant, 44.54% are predicted in the correct cell type, 58.33% have the correct sign, and  
304 15.08% are directly bound by TCX2. Our results showed that most of the stem cell markers are  
305 mis-expressed in other stem cells in the *tcx2* mutant (Figure 3), suggesting that either TCX2  
306 could affect the stem-cell-specific localization of some of these genes or that their cell identity is  
307 delayed.

308 We showed that *tcx2* mutants have additional cell divisions in all stem cell populations,  
309 misexpression of known stem-cell-specific marker genes, and higher expression of the cell cycle  
310 marker CYCB1;1. Further, our ODE model of the TCX2 GRN illustrated that we can use TCX2  
311 expression to predict the timing of stem cell division. Specifically, our model and TCX2:TCX2-  
312 YFP tracking support that a drop in TCX2 expression in most of the stem cell populations  
313 between 4D 16H and 5D correlates with stereotypical stem cell division. In contrast, TCX2  
314 levels are relatively stable during this time in the relatively mitotically inactive QC. This is  
315 supported by our stem-cell-specific profiling of the *tcx2* mutant which shows that many cell  
316 cycle genes, including members of the CYCLIN and CYCLIN DEPENDENT KINASE families,  
317 are differentially expressed in different stem cell types (Supplementary Table 5). Notably, TCX2  
318 is a member of the CHC protein family, which in mammalian systems contains components of  
319 the DREAM complex such as LIN54<sup>12</sup>. The DREAM complex has been shown to regulate the  
320 cell cycle, which supports our proposed role for TCX2 in regulating stem cell division in the  
321 Arabidopsis root. It is likely that the other members of the CHC family and other homologs of  
322 the DREAM complex in Arabidopsis act together with TCX2 to control this process.

323 Taken together, our results provide evidence that cell-ubiquitous genes and global signaling  
324 mechanisms are important for maintaining stem cell identity and plasticity.

## 325 **Materials and Methods**

### 326 **Lines used in this study**

327 A list of T-DNA insertion lines used in this study is provided in Supplemental Table 9. All T-  
328 DNA insertion lines were obtained from the Arabidopsis Biological Resource Center (ABRC:  
329 <https://abrc.osu.edu/>). The marker lines used in this study are described as follows:  
330 WOX5:GFP<sup>21</sup>, CYCD6:GFP<sup>22</sup>, J2341:GFP<sup>34</sup>, FEZ:FEZ-GFP<sup>24</sup>, TMO5:3xGFP<sup>25</sup>, CVP2:NLS-  
331 VENUS<sup>35</sup>, AGL42:GFP<sup>36</sup>. The TCX2:TCX2-YFP translation fusion is described in<sup>12</sup>, the  
332 WOX5:WOX5-GFP translational fusion is described in<sup>33</sup>, the CYCB1;1:CYCB1;1-GFP  
333 translational fusion is described in<sup>20</sup>, and the TMO3:TMO3-GFP translational fusion is described  
334 in<sup>37</sup>.

### 335 **Stem cell transcriptional profile and differential expression analysis**

336 Three to four biological replicates were collected for each marker line. For each biological  
337 replicate, 250-500mg of seed were wet sterilized using 50% bleach, 10% Tween and water and  
338 stratified at 4°C for 2 days. Seeds were plated on 1x MS, 1% sucrose plates with Nitex mesh and  
339 grown under long day conditions (16 hr light/8 hr dark) at 22°C for 5 days. Protoplasting, cell  
340 sorting, RNA extraction, and library preparation were performed as described in<sup>36</sup>. For the non-  
341 stem cell control, the GFP-negative cells from the AGL42:GFP line were collected. Libraries  
342 were sequenced on an Illumina HiSeq 2500 with 100bp single end reads. Reads were mapped  
343 and FPKM (fragments per kilobase per million mapped reads) values were obtained using  
344 Bowtie, Tuxedo, and Rsubread as described in<sup>38</sup>. Data are available on Gene Expression  
345 Omnibus (GEO: <https://www.ncbi.nlm.nih.gov/geo/>), accession #GSE98204.

346 Differential expression analysis was performed using PoissonSeq<sup>38,39</sup>. First, stem cell-enriched  
347 genes were identified as being enriched (q-value < 0.06 and fold change > 2) in any one stem cell  
348 population compared to the non-stem cell control (q-value cutoff of 0.06 was chosen since one of  
349 our marker genes, WOX5, had q-value 0.058). Then, genes were classified as enriched in each



350 stem cell type if they had fold change  $> 2$  (enrichment criteria set based on our marker genes) in  
351 that stem cell type versus all other stem cell types. If genes were equally expressed in more than  
352 one stem cell type, they were considered enriched in multiple stem cell types. All differentially  
353 expressed genes are reported in Supplemental Table 1. The Venn diagram in Figure 1C  
354 displaying the proportions of genes enriched in each stem cell was constructed using  
355 InteractiVenn<sup>40</sup> (<http://www.interactivenn.net/>).

### 356 **Gene regulatory network inference**

357 The Regression Tree Pipeline for Spatial, Temporal, and Replicate data (RTP-STAR) was used  
358 for all network inference. The pipeline consists of three parts: spatial clustering using the *k*-  
359 means method<sup>41</sup>, network inference using GENIE3<sup>42</sup>, and edge sign (positive/negative) inference  
360 using the first order Markov method<sup>10</sup>. An earlier version of this pipeline was used to infer GRNs  
361 of root hair development<sup>43</sup>. This pipeline is implemented in MATLAB and available from  
362 <https://github.com/nmclark2/RTP-STAR>.

363 For the SCN GRN (Figure 2), networks were inferred for each stem cell separately (resulting in 6  
364 networks, one for each stem cell) and then combined to form the final network. For the stem-  
365 cell-specific networks, only the genes enriched in that specific stem cell were used in the  
366 network inference. If genes were enriched in multiple stem cells, they were included in all of  
367 those individual stem cell networks (e.g. TCX2, which is enriched in all of the stem cells except  
368 Protophlo, was included in 5 of the 6 stem cell networks). Genes were first clustered using the  
369 mean expression of each gene in each stem cell. Then, network inference was performed using  
370 GENIE on only the replicates from that specific stem cell and the SCN marker (e.g. for the QC-  
371 enriched cells, only the WOX5:GFP and AGL42:GFP replicates were used). After network  
372 inference, the number of edges in the network is trimmed based on the proportion of  
373 transcription factors (more transcription factors = more edges kept). Finally, the sign of the edge  
374 was determined using a previously published time course dataset of Arabidopsis root stem cells  
375 collected from 3 day to 7 day old plants<sup>10</sup>.

376 For the time point-specific GRNs (Figure 4 and Supplementary Figure 6), we used genes DE in  
377 the *tcx2* mutant root tissue sample and enriched in the stem cells. Clustering was performed as  
378 for the SCN GRN using mean gene expression in each stem cell. Network inference was  
379 performed using the biological replicates from each time point from our stem cell time course  
380 collected every 8 hours from 4 days to 6 days old (see Stem cell time course section for more  
381 details). Edge sign was determined using this same time course, but using mean expression in all  
382 of the time points. One network was built using the biological replicates for each time point and  
383 then combined. In Figure 4, the stem cell transcriptomic data was used to determine the stem cell  
384 type of each edge.

385 Due to the pseudo-random nature of *k*-means clustering (i.e., the first clustering step is always  
386 random), 100 different clustering configurations (numiter=100 in RTP-STAR parameters) were  
387 used for network inference. For the stem cell transcriptional network, edges that appeared in at  
388 least 1/3 of the 100 different networks (maxprop=1/3 in RTP-STAR parameters) were retained in  
389 the final network as this cutoff resulted in a scale-free network. This parameter was set to edges  
390 that appeared in at least 45% of the 100 different networks (maxprop=0.45 in RTP-STAR  
391 parameters) for the time point-specific GRNs.

392 All parameters used to infer these networks in RTP-STAR are included in Supplementary Table  
393 10. All files used to perform GRN inference are available on figshare (see Data Availability  
394 section). All network visualization was performed using Cytoscape (<http://cytoscape.org/>).

### 395 **Network Motif Score (NMS)**

396 Five different motifs were used to calculate the NMS namely feed-forward loops, feedback  
397 loops, diamond, bi-fan, and multilayer motifs<sup>14-16</sup> (Supplementary Figure 2). All motifs were  
398 significantly enriched in the SCN GRN to a randomly generated network of the same size. First,  
399 the number of times a gene appeared in each motif was counted using the NetMatchStar app<sup>44</sup> in  
400 Cytoscape. Then, the counts were normalized to a scale from 0 to 1 and summed to calculate the  
401 NMS for each gene. The most functionally important genes are those that have high NMS scores.

### 402 **Biological validation**

403 Confocal imaging was performed on a Zeiss LSM 710. Cell walls were counterstained using  
404 propidium iodide (PI). Corrected Total Cell Fluorescence (CTCF) was calculated to determine  
405 the intensity of cells expressing a fluorescently tagged protein. To complete these measurements,  
406 the confocal settings (gain, digital offset, laser percentage) were left constant for the entirety of  
407 the experiment. Imaging software (ImageJ) was used to measure the CTCF, which is defined as  
408 (Integrated density of GFP)/(Area of selected cells \* Mean fluorescence of background) where  
409 background is a region of the root with no GFP<sup>45</sup>. The CTCF was divided by the area of the cells  
410 (CTCF/area) before performing statistics to account for different numbers of cells selected in  
411 each image. When counting cells with GFP expression, a local auto threshold using the  
412 Phansalkar method was applied in ImageJ to the GFP channel before counting.

413 For qPCR, total RNA was isolated from approximately 2mm of 5 day old Col-0, *gata9-1*, *gata9-*  
414 *2*, *at1g75710-1*, *at1g75710-2*, *rev-5*, *orc1b-1*, *orc1b-2*, *anl2-2* and *anl2-3*, root tips using the  
415 RNeasy Micro Kit (Qiagen). qPCR was performed with SYBR green (Invitrogen) using a 7500  
416 Fast Real-Time PCR system (Applied Biosystems) with 40 cycles. Data were analyzed using the  
417  $\Delta\Delta C_t$  (cycle threshold) method and normalized to the expression of the reference gene  
418 UBIQUITIN10 (UBQ10).. qPCR was performed on two technical replicates of two to three  
419 independent RNA samples (biological replicates). Differential expression was defined as a  
420  $p < 0.05$  using a z-test with a known mean of 1 and standard deviation of 0.17 (based on the Col-0  
421 sample). Primers used for qPCR are provided in Supplementary Table 11. SHR regulation of  
422 TCX2 was validated using data from<sup>20</sup>.

### 423 **Stem-cell-specific transcriptional profiling in the *tcx2* mutant**

424 Three biological replicates were collected for WOX5:GFP, CYCD6:GFP, FEZ:FEZ-GFP, and  
425 TMO5:3xGFP crossed into the *tcx2-2* or *tcx2-3* mutant background. Seedlings were grown and  
426 roots were collected as described for the stem cell transcriptional profile. Libraries were  
427 sequenced on an Illumina HiSeq 2500 with 100bp single end reads. Reads were mapped and  
428 FPKM (fragments per kilobase per million mapped reads) values were obtained using Bowtie,  
429 Tuxedo, and Rsubread as described in<sup>38</sup>. Differential expression analysis was performed using  
430 PoissonSeq<sup>38,39</sup>. To account for differences in library size between the stem cell transcriptional  
431 profile and the TCX2 cell specific transcriptional profile, library sizes were normalized before  
432 differential expression was performed. We set a differential expression cutoff of  $q < 0.05$  and fold

433 change > 2 based on our cutoff for the stem cell transcriptional profile. All profile. All profile. All  
434 differentially expressed genes are reported in Supplemental Table 1.

435 For the *tcx2-3* transcriptional profile, total RNA was isolated from approximately 2mm of 5 day  
436 old Col-0 and *tcx2-3* root tips using the RNeasy Micro Kit. cDNA synthesis and amplification  
437 were performed using the NEBNext Ultra II RNA Library Prep Kit for Illumina. Libraries were  
438 sequenced on an Illumina HiSeq 2500 with 100 bp single-end reads. Reads were mapped and  
439 differential expression was calculated as previously described, except the differential expression  
440 criteria were chosen as  $q < 0.5$  and fold change > 1.5 based on the values for TCX2, which was  
441 assumed to be differentially expressed in its own mutant background.

442

443 All differentially expressed genes are reported in Supplemental Table 5. Data for both the stem  
444 cell type specific profiling and root tip profiling are available on GEO, accession #GSE123984.

445

#### 446 **TCX2:TCX2-YFP and CYCB1;1:CYCB1;1-GFP tracking**

447 Confocal images of the TCX2:TCX2-YFP, CYCB1;1:CYCB1;1-GFP, and CYCB1;1:CYCB1;1-  
448 GFP x *tcx2* lines were obtained by imaging roots submerged in agar every 2 hours. A  
449 MATLAB-based image analysis software ([https://github.com/edbuckne/BioVision\\_Tracker](https://github.com/edbuckne/BioVision_Tracker)) was  
450 used to detect, segment, and track individual cells expressing YFP/GFP in 3D time-course  
451 fluorescence microscopy images<sup>46</sup>. The average voxel intensity, which is a proxy for YFP/GFP  
452 expression, was measured as the average voxel value within the set of voxels describing a  
453 segmented cell.

#### 454 **Scanning Fluorescence Correlation Spectroscopy (Scanning FCS)**

455 Image acquisition for Scanning FCS was performed on a Zeiss LSM880 confocal microscope.  
456 For Number and Brightness (N&B) on the TCX2:TCX2-YFP and 35S:YFP lines, the parameters  
457 were set as follows: image size of 256x256 pixels, pixel dwell time of 8.19  $\mu$ s, and pixel size of  
458 100 nm. The 35S:YFP line was used to calculate the monomer brightness and cursor size as  
459 described in<sup>27,47</sup>. For Pair Correlation Function (pCF) on the 35S:GFP, TCX2:TCX2-YFP and  
460 TMO3:TMO3-GFP lines, the parameters were set as follows: image size of 32x1 pixels, pixel  
461 dwell time of 8.19  $\mu$ s, and pixel size between 100-500nm. The movement index (MI) of the  
462 35S:GFP line was used as a positive control. All analysis was performed in the SimFCS software  
463 as described in<sup>27,47</sup>.

#### 464 **Stem cell time course**

465 Two to three biological replicates were collected for each time point. For each biological  
466 replicate, 100-250mg of PET111:GFP seed were wet sterilized using 50% bleach, 10% Tween  
467 and water and stratified at 4°C for 2 days. Seeds were plated on 1x MS, 1% sucrose plates with  
468 Nitex mesh and grown under long day conditions (16 hr light/8 hr dark) at 22°C for 4 days, 4  
469 days 8 hours, 4 days 16 hours, 5 days, 5 days 8 hours, 5 days 16 hours, and 6 days. Roots were  
470 collected at the same time of day for all samples to minimize circadian effects. GFP-negative  
471 cells were collected as PET111:GFP marks only the differentiated columella, so collecting the  
472 surrounding GFP-negative cells results in a population of mostly stem cells. Protoplasting, cell  
473 sorting, RNA extraction, and library preparation were performed as described in<sup>36</sup>. Libraries  
474 were sequenced on an Illumina HiSeq 2500 with 100bp single end reads. Reads were mapped  
475 and FPKM (fragments per kilobase per million mapped reads) values were obtained using

476 Bowtie, Tuxedo, and Rsubread as described in<sup>38</sup>. Data are available on Gene Expression  
477 Omnibus (GEO: <https://www.ncbi.nlm.nih.gov/geo/>), accession #GSE131988.

#### 478 **Ordinary Differential Equation (ODE) modeling**

479 ODE equations were constructed based on the GRNs shown in Figure 4A. One set of equations  
480 was built for each gene in each cell type. The equations changed at 4D 8H and 4D 16H to  
481 account for the changes in the predicted network (as shown in Figure 4A). If a sign was not  
482 predicted in the network, it was assumed that the regulation was positive (activation) in the  
483 model. A schematic showing the location of genes, and what proteins can move between cell  
484 types, is presented in Supplementary Figure 7. All equations are provided in Supplemental  
485 Equations.

486 A sensitivity analysis was performed using the total Sobol index<sup>25,38,39</sup>. Sensitive parameters  
487 were defined as having a significantly higher ( $p < 0.05$ ) total Sobol index than the control  
488 parameter using a Wilcoxon Test with Steel-Dwass for multiple comparisons. (Supplemental  
489 Table 6) The sensitive diffusion coefficients and oligomeric states were experimentally measured  
490 using scanning FCS. The remainder of the parameters were estimated either directly from the  
491 stem cell time course or by using simulated annealing<sup>50</sup> on the stem cell time course. For  
492 simulated annealing, Latin hypercube sampling was used to sample the parameter space for a  
493 total of 50 sets of initial parameter estimates. Each set of initial estimates was fit to the residual  
494 function using simulated annealing with least squares (simulannealbnd function in MATLAB)  
495 for 5 minutes (total runtime = 250 minutes for 50 sets of initial estimates). The average of the 10  
496 parameter values with the lowest error was used in the final model simulation. All parameter  
497 values, and how they were estimated, are reported in Supplemental Table 7. All MATLAB files  
498 used for the ODE model are available on figshare (see Data Availability section).

#### 499 **Statistics**

500 For all confocal phenotyping and RICS analyses, a two-tailed Wilcoxon test (for one  
501 comparison) or Steel-Dwass with control (for multiple comparisons) was used as some of the  
502 data did not follow a normal distribution. All exact p-values, test statistics, and sample sizes are  
503 included in Source Data.

#### 504 **Data Availability**

505 All raw RNA-Seq data and calculated FPKM values are available on GEO, accession  
506 #GSE98204, GSE123984, and GSE131988. The Source Data underlying Figure 3 and  
507 Supplementary Figures 3, 4, 5, 8, and 9 are provided as a Source Data file. All raw images, the  
508 data used for GRN inference, and MATLAB code for the ODE model are deposited on figshare:  
509 [10.6084/m9.figshare.c.4539071](https://www.figshare.com/projects/10.6084/m9.figshare.c.4539071)

#### 510 **Supplementary Information**

511 Supplementary figures, tables, and equations are included in the Supplementary Information  
512 PDF.

#### 513 **Contributions**

514 NMC and RS conceptualized the study and designed the experiments. NMC and APF performed  
515 transcriptional profiling. NMC and MAdLB performed differential expression analysis. NMC,

516 ECN, TTN, TBS, and PJS performed biological validation. NMC, ECN, TTN, and PJS collected  
517 confocal images. NMC constructed and analyzed the mathematical model. ARS and DCB  
518 contributed the TCX2:TCX2-YFP translational fusion. EB and CMW analyzed the YFP tracking  
519 data. NMC and RS wrote the paper, and all co-authors edited the paper.

## 520 **Acknowledgements**

521 We thank Christian Hardtke and Antia Rodriguez-Villalon for providing the CVP2:NLS-VENUS  
522 line. We thank Rüdiger Simon and Barbara Berckmans for providing the WOX5:WOX5-GFP  
523 line. We thank Irena Brglez for her assistance with media preparation. We thank Sarah Schuett  
524 and the Flow Cytometry and Cell Sorting Laboratory at North Carolina State University (NCSU)  
525 for their assistance with cell sorting. Images in this manuscript were generated using the  
526 instruments and services at the Cellular and Molecular Imaging Facility (CMIF) at NCSU. Next-  
527 generation sequencing was performed by the Genomic Sciences Laboratory (GSL) at NCSU.

## 528 **Funding**

529 This work was supported by an NSF GRF (DGE-1252376) awarded to NMC and APF. EB is  
530 supported by a GAAN Fellowship in Molecular Biotechnology (grant #P200A160061). ARS was  
531 supported by the Donald Kennedy Fellowship and NIH graduate training grant  
532 NIH5T32GM007276 to Stanford University. PJS was supported by an Integrated Molecular  
533 Plant Systems Research Experience for Undergraduates (IMPS REU) grant awarded to NCSU.  
534 DCB is an investigator of the Howard Hughes Medical Institute. Research in the RS lab was  
535 funded by an NSF CAREER grant (MCB-1453130) and the NC Agricultural & Life Sciences  
536 Research Foundation in the College of Agricultural and Life Sciences at NC State University.

537 **Main Figures**

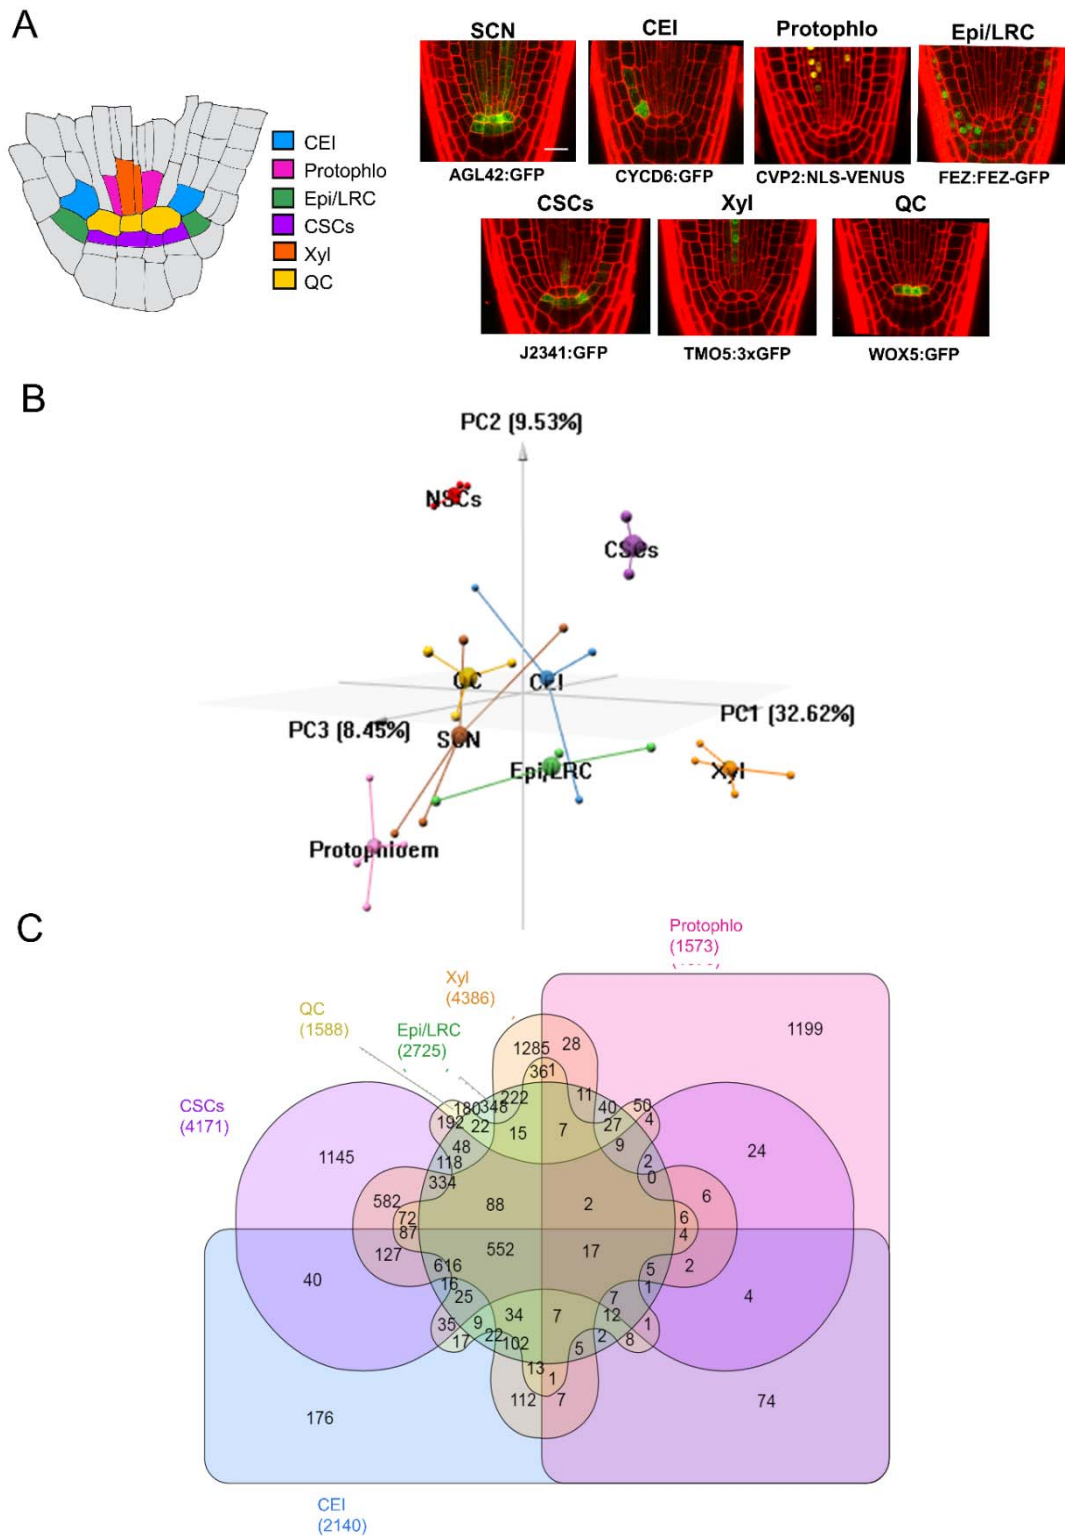

538

539 **Figure 1. Distribution of cell-specific and cell-ubiquitous genes within the Arabidopsis root**  
 540 **stem cell niche. (A) (left) Schematic of the Arabidopsis root stem cell niche. CEI – cortex**

541 endodermis initials (blue); Protophlo- protophloem (pink); Epi/LRC – epidermis/lateral root cap  
542 initials (green); CSCs – columella stem cells (purple); Xyl – xylem initials (orange); QC –  
543 quiescent center (yellow). (left) GFP marker lines used to transcriptionally profile stem cells.  
544 SCN – stem cell niche; Scale bar = 20 $\mu$ m. (B) 3D principal component analysis (PCA) of the  
545 stem cell transcriptional profiles. The x, y, and z axis represent the three largest sources of  
546 variation (i.e. three largest principal components) of the dataset. Small spheres are biological  
547 replicates, large spheres are centroids. Red – Non stem cells (NSCs); Brown – SCN; Blue – CEI;  
548 Pink – Protophlo; Green – Epi/LRC; Purple – CSCs; Orange – Xyl; Yellow – QC; (C)  
549 Distribution of the 9266 stem cell-enriched genes across the stem cell niche. Enrichment criteria  
550 are q-value < 0.05 (from PoissonSeq) and fold change in expression > 2.

A

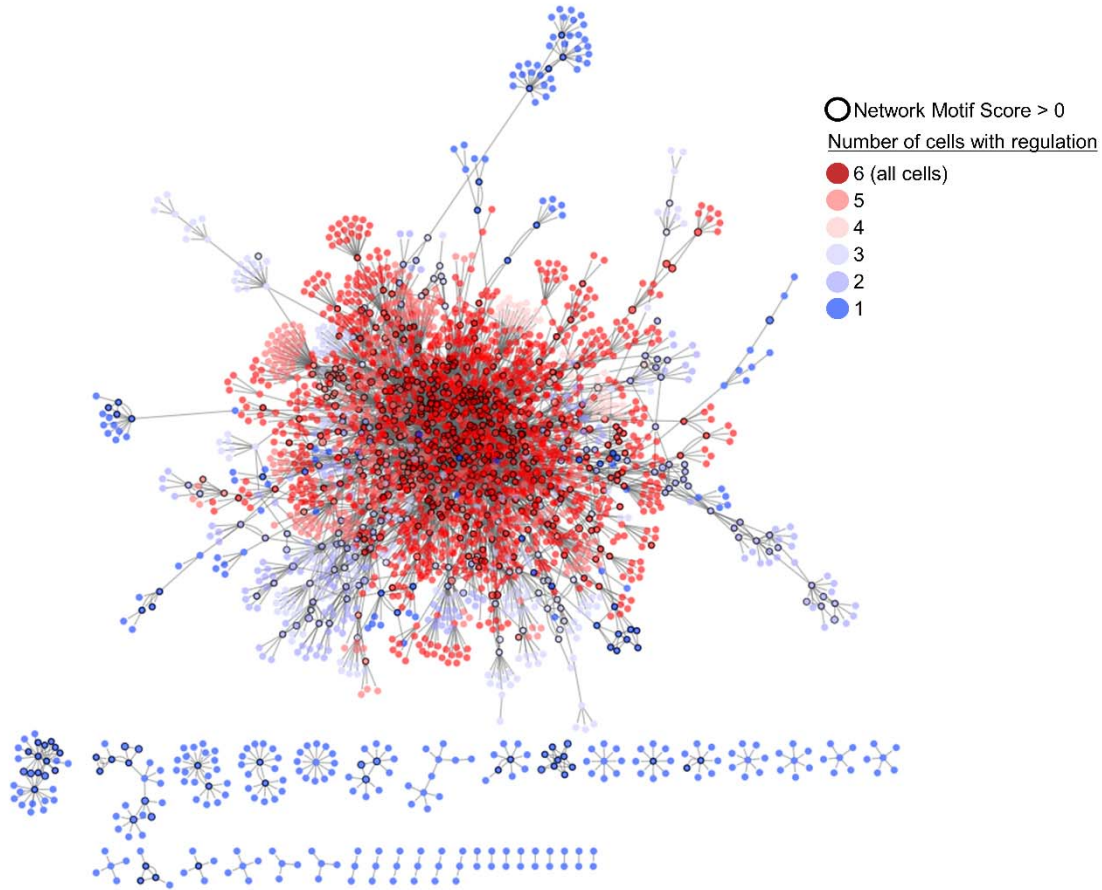

B

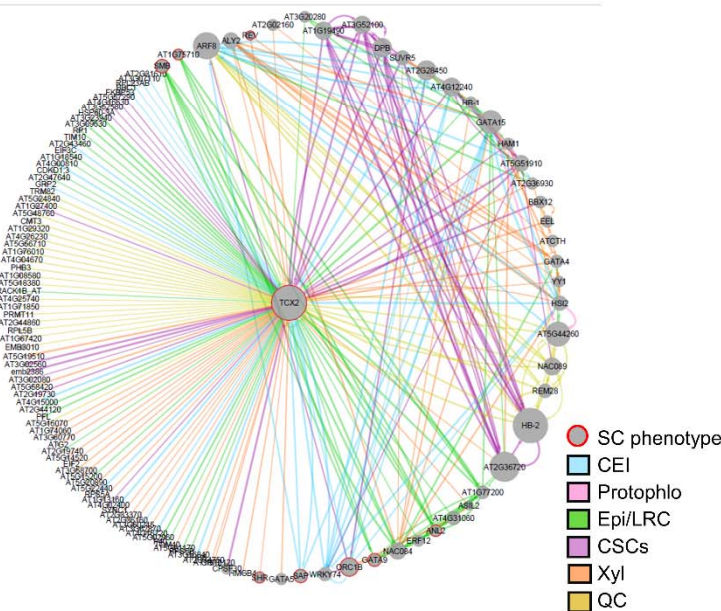

C

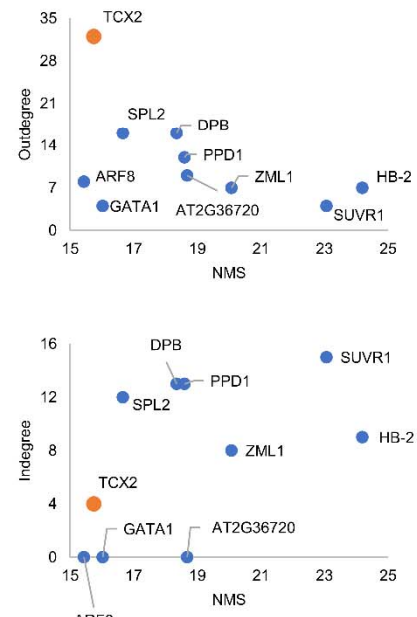

551

552 **Figure 2. Gene regulatory network (GRN) of the stem cell-enriched genes connects cell-**  
 553 **specific and cell-ubiquitous hub genes.** (A) Inferred GRN of 2982 out of the 9266 stem cell-  
 554 enriched genes. Genes are colored based on the number of genes in which they are enriched, with



555 red genes (>3 enriched cells) considered cell-ubiquitous and blue genes ( $\leq 3$  enriched cells)  
 556 considered cell-specific. Black outlines represent hub genes which have a normalized motif score  
 557 (NMS) > 0. (B) First-neighbor GRN of TCX2. Gene size represents the NMS score. Red borders  
 558 represent the genes which have a known stem cell (SC) phenotype. Edge colors represent the cell  
 559 in which the regulation is inferred. Blue – CEI; Pink – Protophlo; Green – Epi/LRC; Purple –  
 560 CSCs; Orange – Xyl; Yellow – QC. (C) Outdegree (top plot) and indegree (bottom plot) vs NMS  
 561 score of the genes with the top 10 NMS scores in (A). TCX2 is highlighted in orange.

A

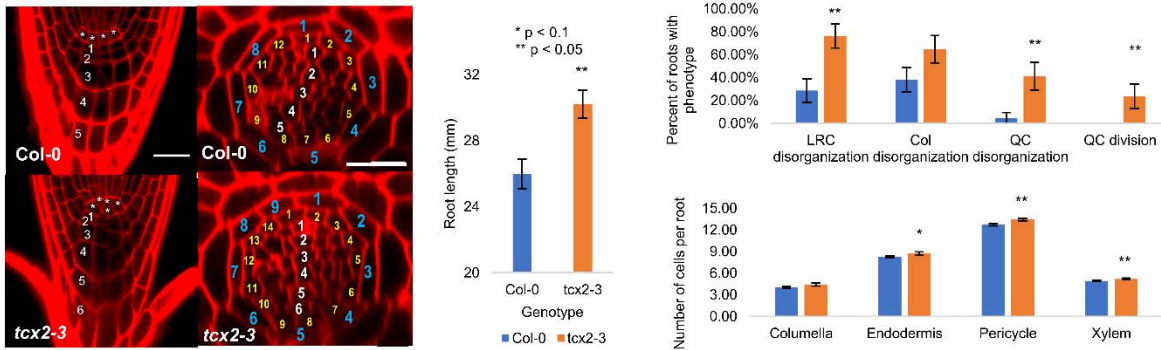

B

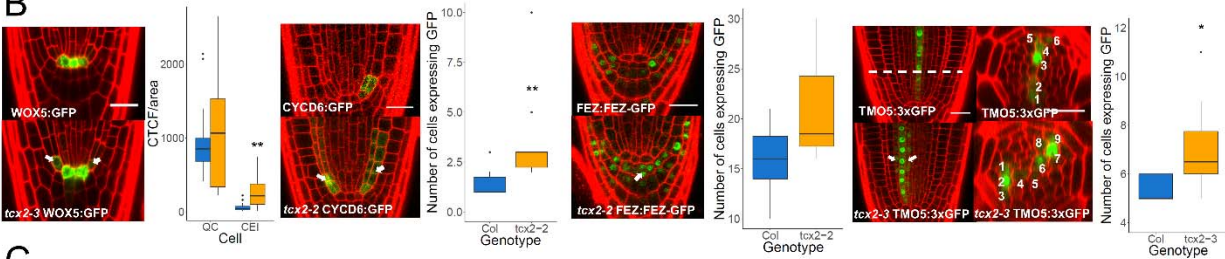

C

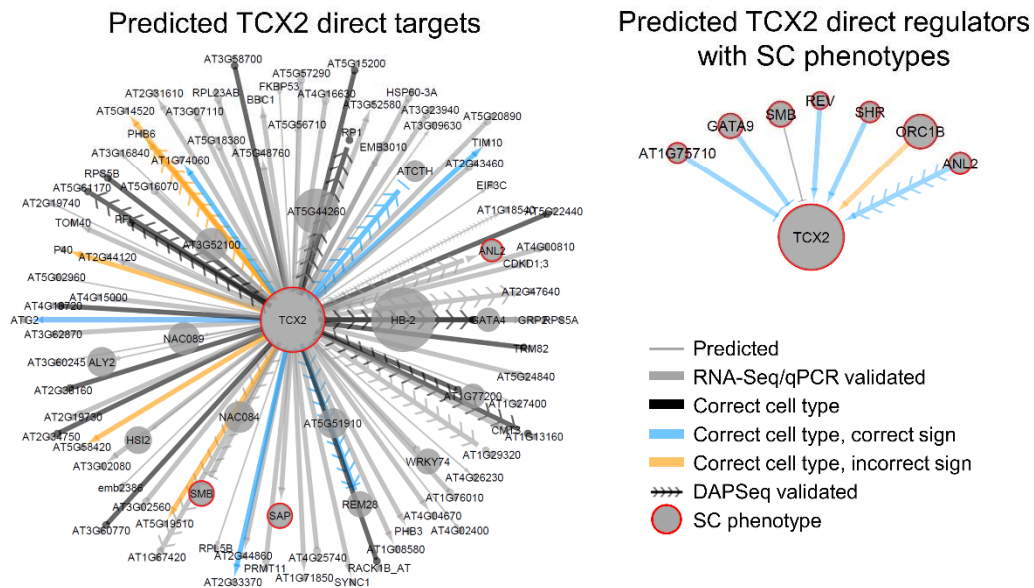

562

563 **Figure 3. TCX2 controls stem cell division through cell-specific regulators and targets.** (A)  
 564 (Left panel) Medial longitudinal (left) and radial (right) sections of 5 day old WT (top) and *tcx2*

565 mutant (bottom) plants. In medial longitudinal sections, \* labels QC cells and numbers denote  
566 columella cell files. In radial sections, white numbers denote xylem cells, yellow pericycle, and  
567 blue endodermis. (Middle panel) Length of 7 day old WT (blue, n=18) and *tcx2* mutant (orange,  
568 n=18) roots. (Right panel) Quantification of stem cell phenotypes (top plot) and number of cell  
569 files (bottom plot) in 5 day old WT (blue) and *tcx2* mutant (orange) roots. \* denotes  $p < 0.1$ , \*\*  
570 denotes  $p < 0.05$ , Wilcoxon test. Error bars denote SEM. (B) (left panels) Medial longitudinal  
571 sections of 5 day old WOX5:GFP (left), CYCD6:GFP (second from left), FEZ:FEZ-GFP (third  
572 from left), and TMO5:3xGFP (right) in WT (top) and *tcx2* mutant (bottom) plants. For  
573 TMO5:3xGFP, a radial section (middle) is also shown taken at the location of the white, dashed  
574 line. (right panels) Quantification of GFP in WT (blue, n>5) and *tcx2* mutant (orange, n>5)  
575 plants. Black dots represent outliers. \* denotes  $p < 0.1$ , \*\* denotes  $p < 0.05$ , Wilcoxon test. (C)  
576 (left) Predicted direct targets of TCX2 and (right) predicted upstream regulators of TCX2 with  
577 stem cell (SC) phenotypes. Gene size represents the NMS score. Red borders represent the genes  
578 that have a known SC phenotype. Arrows represent predicted activation, bars inferred repression,  
579 and circles no inferred sign. Thick edges were validated using qPCR/RNA-Seq. Black edges  
580 were predicted in the correct cell type but did not have a predicted sign. Blue edges have the  
581 correct cell type and correct sign, while orange edges have the correct cell type but the incorrect  
582 sign. Arrows with chevrons are DAPSeq validated. Source data are provided as a Source Data  
583 file.

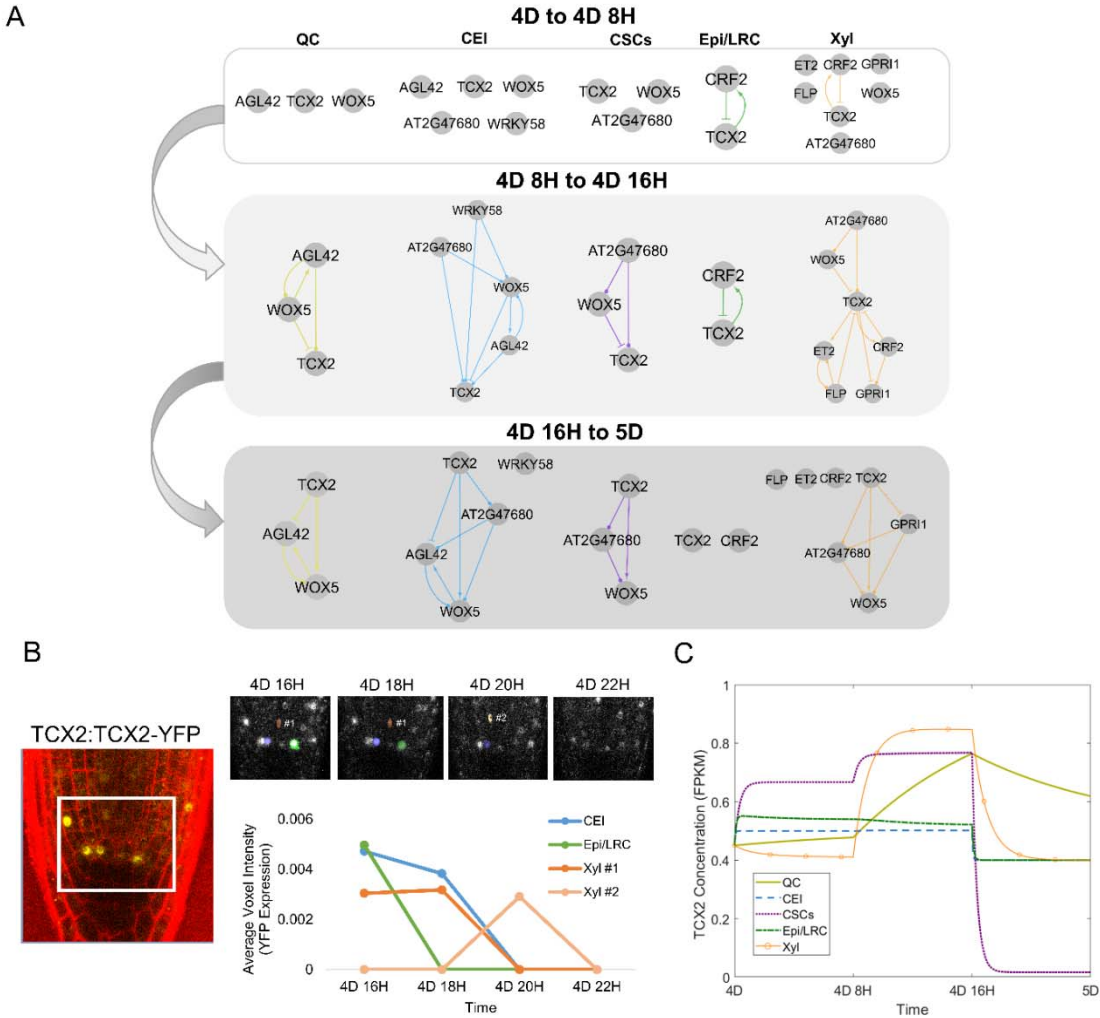

584

585 **Figure 4. Mathematical modeling of TCX2 network predicts timing of cell division.** (A)  
 586 TCX2 first neighbor TF networks predicted using RTP-STAR on the stem cell time course for 4  
 587 day (4D) to 4 days 8 hours (4D 8H) (top), 4D 8H to 4D 16H (middle), and 4D 16H to 5D  
 588 (bottom). Networks are separated based on the cell type the genes are expressed in: QC (yellow),  
 589 CEI (blue), CSCs (purple), Epi/LRC (green), Xyl (orange). Arrows represent predicted  
 590 activation, bars inferred repression, and circles no inferred sign. (B) (left) Representative image  
 591 of TCX2:TCX2-YFP at 4D 16H. White box represents the stem cell niche were cells were  
 592 tracked over time. (right, top) YFP-positive cells tracked every 2 hours from 4D 16H (left) to 4D  
 593 20H (right). Stem cells that were tracked are marked in blue (CEI), green (Epi/LRC), and orange  
 594 (Xyl). Two Xyl cells were tracked, #1 and #2. All of these 4 stem cells had no measurable YFP  
 595 expression at 4D 22H. (right, bottom) Quantification of YFP expression in tracked cells. (C) ODE  
 596 model prediction of cell-specific TCX2 expression from 4D to 5D. FPKM: fragments per  
 597 kilobase per million mapped reads.

598

599 **References**

- 600 1. Alessio, A. C. D. *et al.* A systematic approach to identify candidate transcription factors  
601 that control cell identity. *Stem Cell Reports* **5**, 763–775 (2015).
- 602 2. Morris, S. A. & Daley, G. Q. A blueprint for engineering cell fate: current technologies  
603 to reprogram cell identity. *Cell Res.* **23**, 33–48 (2013).
- 604 3. Bulstrode, H. *et al.* Elevated FOXG1 and SOX2 in glioblastoma enforces neural stem cell  
605 identity through transcriptional control of cell cycle and epigenetic regulators. *Genes Dev.*  
606 **31**, 1–17 (2017).
- 607 4. Vierbuchen, T. & Wernig, M. Molecular Roadblocks for Cellular Reprogramming. *Mol.*  
608 *Cell* **47**, 827–838 (2012).
- 609 5. Graf, T. & Enver, T. Forcing cells to change lineages. *Nature* **462**, 587–594 (2009).
- 610 6. Sancho-Martinez, I., Baek, S. H., Carlos, J. & Belmonte, I. Lineage conversion  
611 methodologies meet the reprogramming toolbox. *Nat. Cell Biol.* **14**, 892–899 (2012).
- 612 7. Clevers, H., Loh, K. M. & Nusse, R. An integral program for tissue renewal and  
613 regeneration: Wnt signaling and stem cell control. *Science* (80-. ). **346**, 1248012 (2014).
- 614 8. Es, J. H. Van *et al.* Dll1 + secretory progenitor cells revert to stem cells upon crypt  
615 damage. *Nat. Cell Biol.* **14**, 1099–1104 (2012).
- 616 9. Gallagher, K. L., Sozzani, R. & Lee, C. Intercellular Protein Movement: Deciphering  
617 the Language of Development. *Annu. Rev. Cell Dev. Biol.* **30**, 207–233 (2014).
- 618 10. de Luis Balaguer, M. A. *et al.* Predicting gene regulatory networks by combining spatial  
619 and temporal gene expression data in *Arabidopsis* root stem cells. *Proc. Natl. Acad. Sci.*  
620 **114**, E7632–E7640 (2017).
- 621 11. Li, S., Yamada, M., Han, X., Ohler, U. & Benfey, P. N. High-Resolution Expression Map  
622 of the Arabidopsis Root Reveals Alternative Splicing and lincRNA Regulation. *Dev. Cell*  
623 **39**, 508–522 (2016).
- 624 12. Simmons, A. R., Davies, K. A., Wang, W., Liu, Z. & Bergmann, D. C. SOL1 and SOL2  
625 Regulate Fate Transition and Cell Divisions in the Arabidopsis Stomatal Lineage.  
626 *Development* **146**, dev171066 (2019).
- 627 13. Vaquerizas, J. M., Kummerfeld, S. K., Teichmann, S. A. & Luscombe, N. M. A census of  
628 human transcription factors: function, expression and evolution. *Nat. Rev. Genet.* **10**, 252–  
629 263 (2009).
- 630 14. Alon, U. Network motifs: theory and experimental approaches. *Nat. Rev. Genet.* **8**, 450–  
631 461 (2007).
- 632 15. Milo, R., Shen-Orr, S., Itzkovitz, S. & Kashtan, N. Network Motifs: Simple Building  
633 Blocks of Complex Networks. *Science* **298**, 814–827 (2002).
- 634 16. Ingram, P. J., Stumpf, M. P. H. & Stark, J. Network motifs: Structure does not determine  
635 function. *BMC Genomics* **7**, 1–12 (2006).

- 636 17. Sadasivam, S. & Decaprio, J. A. The DREAM complex: master coordinator of cell cycle-  
637 dependent gene expression. *Nat. Rev. Cancer* **13**, 585–595 (2013).
- 638 18. Schmit, F., Cremer, S. & Gaubatz, S. LIN54 is an essential core subunit of the DREAM /  
639 LINC complex that binds to the cdc2 promoter in a sequence-specific manner. *FEBS J.*  
640 **276**, 5703–5716 (2009).
- 641 19. de Luis Balaguer, M. A. *et al.* Multi-sample Arabidopsis Growth and Imaging Chamber  
642 (MAGIC) for long term imaging in the ZEISS Lightsheet Z.1. *Dev. Biol.* **419**, 19–25  
643 (2016).
- 644 20. Ubeda-Tomas, S. *et al.* Gibberellin Signaling in the Endodermis Controls Arabidopsis  
645 Root Meristem Size. *Curr. Biol.* **19**, 1194–1199 (2009).
- 646 21. Sarkar, A. K. *et al.* Conserved factors regulate signalling in Arabidopsis thaliana shoot  
647 and root stem cell organizers. *Nature* **446**, 811–814 (2007).
- 648 22. Sozzani, R. *et al.* Spatiotemporal regulation of cell-cycle genes by SHORTROOT links  
649 patterning and growth. *Nature* **466**, 128–132 (2010).
- 650 23. Cruz-Ramirez, A. *et al.* A Bistable Circuit Involving SCARECROW-  
651 RETINOBLASTOMA Integrates Cues to Inform Asymmetric Stem Cell Division. *Cell*  
652 **150**, 1002–1015 (2012).
- 653 24. Willemsen, V. *et al.* The NAC Domain Transcription Factors FEZ and SOMBRERO  
654 Control the Orientation of Cell Division Plane in Arabidopsis Root Stem Cells. *Dev. Cell*  
655 **15**, 913–922 (2008).
- 656 25. De Rybel, B. *et al.* A bHLH Complex Controls Embryonic Vascular Tissue Establishment  
657 and Indeterminate Growth in Arabidopsis. *Dev. Cell* **24**, 426–437 (2013).
- 658 26. Helariutta, Y. *et al.* The SHORT-ROOT Gene Controls Radial Patterning of the  
659 Arabidopsis Root through Radial Signaling. *Cell* **101**, 555–567 (2000).
- 660 27. Clark, N. M. *et al.* Tracking transcription factor mobility and interaction in Arabidopsis  
661 roots with fluorescence correlation spectroscopy. *Elife* **5**, e14770 (2016).
- 662 28. Byzova, M. V *et al.* Arabidopsis STERILE APETALA , a multifunctional gene regulating  
663 inflorescence , flower , and ovule development. *Genes Dev.* **2**, 1002–1014 (1999).
- 664 29. Carlsbecker, A. *et al.* Cell signalling by microRNA165/6 directs gene dose-dependent root  
665 cell fate. *Nature* **465**, 316–321 (2010).
- 666 30. O’Malley, R. C. *et al.* Cistrome and Epicistrome Features Shape the Regulatory DNA  
667 Landscape. *Cell* **165**, 1280–1292 (2016).
- 668 31. Gallagher, K. L., Paquette, A. J., Nakajima, K. & Benfey, P. N. Mechanisms Regulating  
669 SHORT-ROOT Intercellular Movement. *Curr. Biol.* **14**, 1847–1851 (2004).
- 670 32. Pi, L. *et al.* Organizer-Derived WOX5 Signal Maintains Root Columella Stem Cells  
671 through Chromatin-Mediated Repression of CDF4 Expression. *Dev. Cell* **33**, 576–588  
672 (2015).

- 673 33. Clark, N. M. *et al.* Cell type-specific differences in protein complex stoichiometry and  
674 transcriptional regulation affect the timing of stem cell division. *bioRxiv* 439331 (2018).
- 675 34. Sabatini, S., Heidstra, R., Wildwater, M. & Scheres, B. SCARECROW is involved in  
676 positioning the stem cell niche in the Arabidopsis root meristem. *Genes Dev.* **17**, 354–358  
677 (2003).
- 678 35. Rodriguez-Villalon, A., Gujas, B., Wijk, R. Van, Munnik, T. & Hardtke, C. S. Primary  
679 root protophloem differentiation requires balanced phosphatidylinositol-4, 5-biphosphate  
680 levels and systemically affects root branching. *Development* **142**, 1–10 (2015).
- 681 36. Nawy, T. *et al.* Transcriptional Profile of the Arabidopsis Root Quiescent Center. *Plant*  
682 *Cell* **17**, 1908–1925 (2005).
- 683 37. Schlereth, A. *et al.* MONOPTEROS controls embryonic root initiation by regulating a  
684 mobile transcription factor. *Nature* **464**, 913–916 (2010).
- 685 38. Clark, N. M., Fisher, A. P. & Sozzani, R. Identifying Differentially Expressed Genes  
686 Using Fluorescence-Activated Cell Sorting ( FACS ) and RNA Sequencing from Low  
687 Input Samples. in *Computational Cell Biology: Methods and Protocols* **1819**, 139–151  
688 (2018).
- 689 39. Li, J., Witten, D. M., Johnstone, I. M. & Tibshirani, R. Normalization , testing , and false  
690 discovery rate estimation for RNA-sequencing data. *Biostatistics* **13**, 523–538 (2012).
- 691 40. Heberle, H., Meirelles, G. V, da Silva, F. R., Telles, G. P. & Mignhim, R. InteractiVenn: a  
692 web-based tool for the analysis of sets through Venn diagrams. *BMC Bioinformatics* **16**,  
693 169 (2015).
- 694 41. Arthur, D. & Vassilvitskii, S. K-Means++: the Advantages of Careful Seeding. *Proc.*  
695 *eighteenth Annu. ACM-SIAM Symp. Discret. algorithms* **8**, 1–11 (2007).
- 696 42. Huynh-Thu, V. A., Irrthum, A., Wehenkel, L. & Geurts, P. Inferring regulatory networks  
697 from expression data using tree-based methods. *PLoS One* **5**, e12776 (2010).
- 698 43. Shibata, M. *et al.* GTL1 and DF1 regulate root hair growth through transcriptional  
699 repression of *ROOT HAIR DEFECTIVE 6-LIKE 4* in *Arabidopsis*. *Development* **145**,  
700 dev159707 (2018).
- 701 44. Rinnone, F. *et al.* NetMatchStar: an enhanced Cytoscape network querying app.  
702 *F1000Research* **4**, 479 (2015).
- 703 45. McCloy, R. A. *et al.* Partial inhibition of Cdk1 in G2phase overrides the SAC and  
704 decouples mitotic events. *Cell Cycle* **13**, 1400–1412 (2014).
- 705 46. Buckner, E. *et al.* Tracking Gene Expression via Light Sheet Microscopy and Computer  
706 Vision in Living Organisms. *40th Int. Conf. IEEE EMBS* 818–821 (2018).
- 707 47. Clark, N. M. & Sozzani, R. Measuring Protein Movement, Oligomerization State, and  
708 Protein–Protein Interaction in Arabidopsis Roots Using Scanning Fluorescence  
709 Correlation Spectroscopy (Scanning FCS). in *Plant Genomics: Methods and Protocols*  
710 **1610**, 251–266 (2017).

- 711 48. Sobol, I. M. Global sensitivity indices for nonlinear mathematical models and their Monte  
712 Carlo estimates. *Math. Comput. Simul.* **55**, 271–280 (2001).
- 713 49. Saltelli, A. *et al.* Variance based sensitivity analysis of model output . Design and  
714 estimator for the total sensitivity index. *Comput. Phys. Commun.* **181**, 259–270 (2010).
- 715 50. Kirkpatrick, S. Optimization by simulated annealing: Quantitative studies. *J. Stat. Phys.*  
716 **34**, 975–986 (1984).
- 717
